1 **Serine peptidases and increased amounts of soluble proteins contribute to heat priming of the plant**  
2 **pathogenic fungus *Botrytis cinerea***

3  
4 Mingzhe Zhang<sup>1</sup>, Naomi Kagan Trushina<sup>1</sup>, Tabea Lang<sup>1,2</sup>, Matthias Hahn<sup>2</sup>, Metsada Pasmanik Chor<sup>3</sup> and Amir  
5 Sharon<sup>1\*</sup>

6  
7 <sup>1</sup>School of Plant Sciences and Food Security, Tel Aviv University, Tel Aviv, Israel.

8 <sup>2</sup>Department of Biology, Technical University of Kaiserslautern, Kaiserslautern, Germany.

9 <sup>3</sup>Bioinformatics Unit, Tel Aviv University, Tel Aviv, Israel.

10 \*Corresponding author. Email: [amirsh@tauex.tau.ac.il](mailto:amirsh@tauex.tau.ac.il)

11

12

13

14

15

## 16 **Abstract**

17 *Botrytis cinerea* causes grey mold disease in leading crop plants. The disease develops only at cool  
18 temperatures, but the fungus remains viable in warm climates and can survive periods of extreme heat. We  
19 discovered a strong heat priming effect in which the exposure of *B. cinerea* to moderately high temperatures  
20 greatly improves its ability to cope with subsequent, potentially lethal temperature conditions. We showed  
21 that priming promotes protein solubility during heat stress and discovered a group of priming-induced serine-  
22 type peptidases. Several lines of evidence, including transcriptomics, proteomics, pharmacology, and  
23 mutagenesis data, link these peptidases to the *B. cinerea* priming response, highlighting their important roles in  
24 regulating priming-mediated heat adaptation. By imposing a series of sub-lethal temperature pulses that  
25 subverted the priming effect, we managed to eliminate the fungus and prevent disease development,  
26 demonstrating the potential for developing temperature-based plant protection methods by targeting the  
27 fungal heat priming response.

28

## 29 **Importance**

30 Priming is a general and important stress adaptation mechanism. Our work highlights the importance of  
31 priming in fungal heat adaptation, reveals novel regulators and aspects of heat adaptation mechanisms, and  
32 demonstrates the potential of affecting microorganisms, including pathogens through manipulations of the  
33 heat adaptation response.

34 **Keywords** Priming, Heat adaptation, Protein solubility, Fungi, Botrytis

35

## 36 **Introduction**

37 *Botrytis cinerea* is a notorious plant pathogen that causes grey mold disease, leading to massive crop losses  
38 worldwide. Its optimum growth temperature is 18–22°C, and grey mold disease is widespread in relatively cool  
39 environments. At temperatures just a few degrees higher than the optimum, the disease completely  
40 disappears; however, the fungus remains viable in warm climate and resumes growth and infection when  
41 temperatures drop to the optimal range. How *B. cinerea* copes with high temperatures and remains viable in  
42 warm environments, including occasional extreme heat waves, is unclear.

43 Temperature shifts alter the expression of thousands of genes. In budding yeast, the most significantly  
44 enriched gene ontology (GO) categories that are upregulated under heat stress include heat shock proteins  
45 (HSPs), oligosaccharide metabolism, protein folding, and protein catabolic and recycling processes (1, 2).  
46 Proteins in these categories, as well as the disaccharide trehalose, help maintain protein homeostasis  
47 (proteostasis) (3, 4). Downregulated genes are typically enriched in translation and ribosome biogenesis, which  
48 correlates with growth arrest at high temperatures (1, 5). Apart from chaperones, the roles of most heat-  
49 induced genes and their protein products remain enigmatic. Most of these genes might help replenish

50 functional proteins that are lost due to increased heat-induced protein aggregation and degradation (2).  
51 Additional studies have highlighted the central roles of proteostasis and protein aggregation in heat adaptation  
52 (6–11).

53 Excess heat causes protein misfolding and aggregation, rapidly endangering cell viability. To cope with  
54 proteotoxic damage, organisms have evolved a quality control (QC) system that removes misfolded proteins by  
55 promoting their refolding using chaperones or by proteolytic degradation through the ubiquitin–proteasome  
56 and autophagy systems (6, 12). When the stress level exceeds the capacity of these systems, proteins form  
57 aggregates, new protein translation slows and growth is arrested (2, 10, 13–15). The sequestration of  
58 misfolded proteins into insoluble aggregates is reversible and likely cytoprotective, as it removes defective and  
59 misfolded toxic proteins from the soluble phase (8, 9). When heat stress is relieved, protein aggregates are  
60 either disaggregated with the aid of the Hsp70, Hsp40, and Hsp110 chaperone network (4, 10, 11, 13, 16) or  
61 eliminated by the proteasome and selective autophagy (6, 17).

62 Although the protein QC system is evolutionarily conserved, fungi exhibit fundamental differences in their  
63 responses to moderate and severe heat stress. The upregulation of molecular chaperones and certain  
64 metabolic processes represents the predominant response of yeast to moderately high temperatures (MHTs;  
65 37°C), whereas under severely high temperatures (SHTs; 42–46°C), protein aggregates form and translation  
66 shuts down (2, 13). Similarly, Gibney et al. (2013) (18) showed that the specific genes that mediate the  
67 responses to severe and moderate heat stress differ considerably, and suggested that the survival of yeast cells  
68 after heat shock might depend on relatively few genes. Importantly, pre-exposure to mild heat stress can  
69 mitigate heat damage while preparing the organism for more severe, potentially lethal stress, a phenomenon  
70 known as priming or acquired stress resistance (19–22). This general mechanism, which is well known in plants,  
71 is also widespread in microorganisms, helping them cope with changing conditions (21, 23–27). Studies in  
72 budding yeast showed that priming is dependent on nascent protein synthesis during moderate but not severe  
73 heat stress (18, 20). In filamentous fungi, priming can boost stress tolerance, however not all fungi respond in  
74 the same manner, and the specific mechanisms may differ depending on the fungal lifestyle (23, 27, 28).

75 Here we show that MHT had a strong priming effect on *B. cinerea*, namely it greatly improved the ability of the  
76 fungus to cope with a subsequent potentially lethal heat stress. Using transcription profiling and proteomics  
77 analysis of soluble and aggregated proteins, we were able to differentiate the priming from a general heat  
78 stress effect and showed that priming improves protein solubility during severe heat stress. Among priming-  
79 associated proteins, we identified one serine-type peptidase that to be essential for the priming response.

80

## 81 **Results**

### 82 ***B. cinerea* growth varies substantially with temperature**

83 We characterized spore germination and the growth of germ tubes (GTs) and mycelia at selected temperatures  
84 between 22°C and 37°C. Both spore germination and mycelial growth decreased with increasing temperatures  
85 above 22°C (Fig. S1a and S1b). Spores were less sensitive to supra-optimal temperatures than mycelia, as spore  
86 germination was completely blocked at 37°C, whereas mycelial growth was completely blocked at 32°C. By  
87 contrast, GT elongation increased at 22–29°C and then declined sharply (Fig. S1c). Spore germination was  
88 delayed at 29°C compared to 22°C, whereas the GT growth rate was much faster at this temperature, resulting  
89 in ~50% longer GTs after 12 h of incubation at 29°C vs. 22°C (Fig. S1d). Exposure of GTs to oxidative (H<sub>2</sub>O<sub>2</sub>) and  
90 cell wall (SDS) stress generated similar response curves (Fig. S1e and S1f), suggesting that the accelerated GT  
91 growth at MHTs represents a general response to moderate stress. Based on these results, we defined 29°C as  
92 MHT and 37°C as SHT, as incubation at 29°C induced stress-adaptive developmental changes, whereas  
93 germination and growth were completely blocked at 37°C. We also determined that the early GT (8–12 h) is a  
94 suitable material in which to study the effects of MHTs and SHTs.

95

#### 96 **MHTs prime cells to better cope with SHTs**

97 We produced GTs at 22°C or 29°C, transferred them to 37°C and monitored cell death by propidium iodide (PI)  
98 staining. Transfer from 22°C to 37°C resulted in massive cell death, with ~80% of GTs showing positive PI  
99 staining after 6 h and 100% after 12 h at 37°C (Fig. 1a and S2a). When GTs were produced at 29°C, the average  
100 rate of cell death following transfer to 37°C was drastically lower, with <5% PI-positive cells after 6 h and <40%  
101 after 12 h at 37°C. Similarly, membrane potential was severely compromised in GTs that were transferred from  
102 22°C to 37°C, but not in those transferred from 29°C to 37°C (Fig. 1b and S2b). Next, we tested the effect of  
103 incubation at 29°C on recovery of the fungus after exposure to 37°C. Colonies originating from GTs produced at  
104 22°C and transferred to 37°C had smaller diameters and less dense mycelia than control colonies kept at 22°C  
105 for 3 d, whereas GTs produced at 29°C developed colonies similar in diameter to control colonies (Fig. 1c and  
106 S2c). Therefore, preincubation at 29°C (MHT) has a strong priming effect that enabled cells to better cope with  
107 successive exposure to the potentially lethal SHT of 37°C.

108

#### 109 **Temperature influences fungal viability and pathogenicity**

110 We inoculated the leaves of French bean (*Phaseolus vulgaris*) plants with spore suspension, incubated them at  
111 22°C or 29°C for 16 h, transferred them to 37°C for 4 h and then incubated them at 22°C for 3 d. When  
112 inoculated plants were incubated at 29°C followed by 37°C, they developed less severe symptoms than plants  
113 incubated at 22°C throughout the experiment (control) but more severe symptoms than those incubated at  
114 22°C + 37°C, with average lesion diameters of 2.0 cm, 2.75 cm and 1.6 cm, respectively (Fig. 1d and S2d).  
115 Extended incubation for 8 h at 37°C had only mild effects on disease symptoms, with slightly reduced lesion  
116 size under both treatments.

117 Exposure of the fungus to 37°C for 6 h without acclimation at 29°C led to cell death, but it did not completely  
118 kill the fungus and did not prevent disease development. Spores were much less sensitive to heat than GTs:  
119 only a small fraction were killed after a lengthy incubation at 37°C (Fig. 2a), and even at 42°C, it took >10 h to  
120 kill ~100% of spores (Fig. 2b). We hypothesized that a series of short pulses of SHT separated by periods of  
121 optimal temperature (OT) might bypass the priming effect and help build up lethal levels of cellular damage(1),  
122 with little or no negative effect on the plant. To test this hypothesis, we exposed GTs to 42°C for 2 h, followed  
123 by 22 h at 22°C. Less than 10% of the cells died after one cycle. However, two cycles of {42°C (2 h) / 22°C (22 h)}  
124 resulted in ~85% cell death, and 100% of the GTs were killed by three cycles of treatment (Fig. 2c and 2d). To  
125 evaluate the effects of heat treatments on pathogenicity, we inoculated plants and exposed them to 42°C for 2  
126 h, followed by 22°C. Disease was completely prevented by three cycles of {42°C (2 h) / 22°C (22 h)} treatment,  
127 and the plants showed no visible stress symptoms (Fig. 2e).

128

### 129 **Search for regulators of the heat priming response**

130 To unravel the molecular mechanisms behind the priming response, we aimed to identify genes and proteins  
131 associated with priming induction and execution.

132 *RNA-seq analysis.* We grew fungi as outlined in Table S1 with four replications per treatment and extracted and  
133 sequenced RNA from the samples. We identified 7,993 differentially expressed genes (DEGs), including 4,814  
134 with a positive false discovery rate (pFDR) < 0.05 and fold change (IFCI) ≥ 2. Of these, 757 DEGs were detected  
135 under MHT, 3,811 under SHT-P (priming conditions) and 3,409 under SHT (Fig. S3d and Table S3). GO  
136 enrichment analysis indicated that the main functional GO categories (Table S4) of the genes downregulated  
137 under SHT-P were ribosome function (GO:0005840, GO:0003735, GO:0015935) and translation (GO:0006412,  
138 GO:0005852, GO:0003743), which is in line with the finding that the translation machinery shuts down under  
139 severe heat stress (2). Two GO categories were specifically downregulated under SHT: zinc ion binding  
140 (GO:0008270) and telomere maintenance (GO:0000723). Genes in these categories trigger cell cycle arrest and  
141 cell death in response to cellular stress (29–31). Among the upregulated genes, only two functional categories  
142 were shared between MHT and SHT-P: proteolysis (GO:0006508) and serine-type peptidase (GO:0008236).

143 To identify the most significant DEGs, stricter selection (pFDR < 0.05, IFCI ≥ 5) were applied, and 1,329 DGEs  
144 were determined, 144 under MHT (29°C), 878 under SHT (22°C + 37°C) and 965 under SHT-P (Fig. S3e).  
145 Heatmap analysis separated the data into two main clusters: OT & MHT and SHT & SHT-P (Fig. 3a). Deeper  
146 inspection revealed two small gene clusters that we interpreted as priming-related genes: cluster A, comprising  
147 39 genes that were upregulated at MHT but not OT or SHT; and cluster B, including 16 of the 39 genes (cluster  
148 A) that were exclusively upregulated at both MHT and SHT-P (Table S5). Four serine peptidase-encoding genes  
149 were shared between the two clusters, and two more were specific to cluster A.

150 As several serine type peptidase-encoding genes were specifically upregulated under priming conditions, we  
151 analyzed the transcript profiles of all 21 annotated *B. cinerea* serine-type peptidase genes by heatmap analysis.  
152 All 21 genes were upregulated under MHT or SHT-P, whereas most were expressed at low levels under OT and  
153 SHT (Fig. 3b).

154 *Proteomic analysis.* We grew fungi as described in Table S6, extracted soluble and aggregated proteins (Fig.  
155 S4a), separated the proteins by SDS-PAGE and stained them with Coomassie brilliant blue. Significantly more  
156 protein aggregates formed under SHT and SHT-P compared to OT and MHT, but minor differences were also  
157 observed between MHT and OT (Fig. S4b). We then analyzed the soluble and aggregated proteins using liquid  
158 chromatography with tandem mass spectrometry (LC-MS/MS). We detected 4,492 proteins (Table S7), with  
159 good separation between soluble and aggregated proteins as well as the four heat treatments (Fig. S4c). The  
160 aggregated proteins under SHT-P and SHT clustered together, whereas the soluble proteins at MHT and SHT-P  
161 formed a subcluster. These results suggest that priming mainly affects the amount and nature of proteins that  
162 remain soluble under heat stress. Therefore, we subsequently analyzed only the soluble proteins.

163 The levels of 1,374 soluble proteins (Table S8) were significantly altered ( $q$ -value  $< 0.05$ ,  $IFCI \geq 2$ ) under the  
164 three heat treatments compared to the control (Fig. S4d). The levels of 147 proteins were higher under SHT vs.  
165 OT, a number significantly lower than those under MHT (429 proteins) and SHT-P (584 proteins). We set two  
166 criteria for identifying priming-associated candidates among soluble proteins: (i)  $\{\log_2(\text{SHT-P}/\text{OT})\} - \{\log_2(\text{SHT}/\text{OT})\} \geq 1$  for proteins more abundant at SHT-P than at SHT; and (ii)  $\log_2(\text{SHT-P}/\text{OT}) > 1$  and  $\log_2(\text{SHT}/\text{OT}) < 1$  for proteins more abundant at SHT-P but not SHT compared to OT. This analysis yielded 355 proteins (Fig. 3c  
169 and Table S9), which we considered to be candidate regulators (MHT-specific) or executors (MHT and/or SHT-P)  
170 of the priming response.

171 GO enrichment analysis of the 355 priming candidates (Table S10) highlighted several major categories,  
172 including transferases (GO:0000030 and GO:0016758), transporters (GO:0005347 and GO:1901505), and  
173 serine-type peptidases (GO:0008236). Serine-type peptidases (STPs) were of particular interest since this group  
174 was also revealed as priming-related by RNA-seq (Fig. 3b). Except for *bcin\_16g02790*, all 9 STPs identified  
175 among the 1,374 soluble proteins were more abundant at MHT and SHT-P, but not at SHT vs. OT (Fig. 3d). The  
176 six serine-type peptidases identified by RNA-seq were included in this set.

177 Collectively, the transcriptomics and proteomics analyses revealed subsets of priming-related GO categories  
178 that only partly overlapped. We also noticed a significant difference between changes in genes and protein  
179 levels during priming: compared with control, the number of DGEs was lowest in MHT (Fig. S3d and S3e),  
180 whereas the changes in soluble proteins were lower at SHT (Fig. S4d).

181

182 **Changes in soluble protein abundance are only partly dependent on gene expression levels**

183 To extract more information from our data, we compared the gene expression and protein abundance data.  
184 For each treatment, we selected all shared genes and soluble proteins with  $pFDR < 0.05$  and evaluated the  
185 correlation between relative gene expression level and protein abundance. The correlations were similar under  
186 MHT ( $R = 0.631$ ) (Fig. 4a) and SHT ( $R = 0.594$ ) (Fig. 4b) and somewhat smaller under SHT-P ( $R = 0.477$ ) (Fig. 4c).  
187 We also noticed a relatively high number of opposite correlations at SHT-P, namely increased protein and  
188 reduced transcript abundance. To explore the nature of these proteins, for each treatment, we selected all  
189 genes with  $\log_2(\text{treatment}/\text{OT}) < 0$  and all proteins with  $\log_2(\text{treatment}/\text{OT}) \geq 1$  and calculated their  
190 proportions. Under SHT-P, 11.56% of all gene–protein pairs had negative correlations (Fig. 4d), a much larger  
191 proportion than under MHT (4.62%) and SHT (1.7%). These results suggest that the levels of many soluble  
192 proteins are regulated in a different manner under SHT-P vs. SHT.  
193 We performed a similar analysis of the 355 priming candidate proteins, using only the data from MHT and SHT-  
194 P, since only 20 gene–protein pairs were found at SHT. At MHT, the correlation between transcript levels and  
195 protein abundance was positive, but it dropped from 0.631 for the entire set to 0.33 (Fig. 4e). Unexpectedly, at  
196 SHT-P, the correlation between shared genes and proteins dropped from 0.477 for the entire set to nearly zero  
197 (Fig. 4f,  $R = 0.04$ ) for the 355 priming-specific candidate proteins. In 54.6% (Fig. 4d) of the cases, transcript  
198 levels decreased while protein abundance increased. The high proportion of negative correlations between  
199 gene expression and soluble protein abundance further suggests that the abundance of soluble priming-related  
200 proteins is controlled by mechanisms other than gene expression. STPs showed the strongest positive  
201 correlation between gene expression and soluble protein levels, and similar candidates were identified by  
202 transcriptomic and proteomic analyses (Fig. 3b and 3d). We therefore investigated whether these shared STPs  
203 function in the priming response.

204

### 205 **Functional analysis of priming-induced serine-type peptidases**

206 To determine whether STPs are required for heat priming, we tested the effects on priming of PMSF, which  
207 specifically inhibits STPs (32, 33). We produced GTs at 29°C, replaced the medium with fresh medium  
208 containing 0.5 or 2 mM PMSF, transferred the samples to 37°C for 4 h and stained them with PI. Treatment  
209 with 2 mM PMSF resulted in 85% cell death vs. no cell death in untreated control GTs and <5% cell death in  
210 samples treated with 0.5mM PMSF or a 2× concentration of a general protease inhibitor cocktail (Fig. 5a and  
211 S5a). Treatment with 2 mM PMSF had almost no effect on GTs that were kept at 29°C, indicating that the drug  
212 suppressed the priming response but did not kill the fungus.

213 To test the possible roles of the six identified STPs in priming, we generated deletion strains for each of the six  
214 genes and tested their priming responses. All deletion strains had normal colony morphology, hyphal growth  
215 and germination rates at 22°C and 29°C (not shown). To evaluate priming responses, we produced GTs at 29°C,

216 transferred them to 37°C and stained them with PI. Compared to the wild type, strain  $\Delta bcin\_08g02390$  showed  
217 markedly increased cell death, whereas the five other deletion strains showed normal levels of cell death (Fig.  
218 5b and S5b). Similarly, the membrane potential of strain  $\Delta bcin\_08g02390$  was compromised following transfer  
219 from 29°C to 37°C (Fig. 5c and S5c).

220 Four of the STPs belong to peptidase group S53 (*BCIN\_06g00620*, *BCIN\_06g00330*, *BCIN\_15g04670* and  
221 *BCIN\_15g03150*). To determine whether the lack of a priming phenotype in a single deletion strain of these  
222 genes resulted from functional redundancy, we generated the strain  $\Delta 4stp$ , with deletions of all four S53 genes.  
223 Similar to the single deletions trains, the  $\Delta 4stp$  strain did not show developmental defects and had a normal  
224 priming response (not shown). Hence, the role of these four S53 genes in priming remains unverified.

225 Because the deletion of *bcin\_08g02390* compromised the priming response of the fungus, we named this gene  
226 *bcprm1* (*B. cinerea* priming 1). To further examine the physiological relevance of the priming defects, we  
227 examined the effect of priming on biomass production of the  $\Delta bcprm1$  strain. We produced uniform wild-type  
228 and  $\Delta bcprm1$  cultures in malt medium at 22°C, transferred them to 29°C for 12 h to induce priming, and  
229 measured the biomass. We then incubated cultures for 12 h at 37°C followed by 22°C for 24 h, and measured  
230 their biomass once again (Fig. S5d). There were no differences in biomass between the wild-type and  $\Delta bcprm1$   
231 strains after incubation at 29°C. However, the recovery of  $\Delta bcprm1$  after incubation at 37°C was compromised,  
232 as it produced ~50% less biomass than the wild type (Fig. 5d and S5e). To examine the effect of the deletion of  
233 *bcprm1* on pathogenicity, we inoculated the leaves of *P. vulgaris* plants with a spore suspension and incubated  
234 them at 29°C for 8 h, then at 37°C for 4 h and then at 22°C for 3 d. Compared to the wild type, plants  
235 inoculated with the mutant strain developed less severe symptoms (Fig. 5e and S5f). Collectively, these results  
236 indicate that the STP BcPrm1 is required for a full-scale priming response and contributes to fungal survival  
237 under SHTs.

238

## 239 Discussion

240 Understanding the mechanisms of heat adaptation in fungi is essential for risk evaluation in preparation for  
241 temperature-driven disease outbreaks (34, 35) and for the rational design of temperature-driven disease  
242 control methods. To help achieve these goals, we studied the mechanisms of heat adaptation in *B. cinerea*, a  
243 cosmopolitan, devastating plant pathogen (36, 37).

244 We found that heat stress adaptation via priming is a powerful mechanism that enables *B. cinerea* to cope with  
245 potentially lethal temperature conditions. Comparative analysis revealed poor correlations between changes in  
246 gene expression and protein abundance under priming conditions, which were most prominent within a set of  
247 355 priming-related soluble proteins (Fig. 3c). Muhlhofer et al. (2019) (2) reported similar results in yeast and  
248 proposed that the massive upregulation of gene expression under moderate heat stress is required to



249 counterbalance increased protein turnover and to maintain metabolism under temperature stress. Accordingly,  
250 we propose that the main function of priming is to maintain protein solubility under SHTs by activating the  
251 compensation system, which stimulates gene expression and protein synthesis (Fig. 6). This assumption is  
252 supported by the relatively good correlation between upregulated genes and proteins under MHT (Fig. 4a).  
253 Under MHT, cellular damage is initially low, and high protein levels lead to excess cellular production and  
254 hence accelerated GT growth (Fig. S1c and S1d), as also demonstrated in yeast (2). During longer stress periods,  
255 damage slowly accumulates, cellular programs deviate from their optimal functions and mycelial growth  
256 decreases over time (Fig. S1b). The high levels of priming-induced soluble proteins might serve as a buffer that  
257 mitigates the detrimental effects of exposure to SHTs. Apart from their buffering capacity, some proteins, such  
258 as the priming-induced STPs, likely have more specific roles.

259 Several lines of evidence, including transcriptomics, proteomics, pharmacological and mutagenesis data, link  
260 STPs to the *B. cinerea* priming response, suggesting that STPs are an important group of heat adaptation  
261 proteins. STPs are highly abundant in all organisms (38) and are involved in proteostasis, thereby contributing  
262 to cell fitness and survival (9, 39). In *Arabidopsis thaliana*, the extracellular subtilase SBT3.3 is required for the  
263 activation of immune priming, which is mediated by a chromatin-remodeling- and salicylic-acid-dependent  
264 mechanism (40). Specific serine peptidases, such as the HTRA (41, 42), Clp (43, 44) and Lon1 (8, 9) proteases,  
265 are associated with heat adaptation, possibly through stabilization of specific proteins or removal of stress-  
266 induced protein aggregates. The upregulation of the six STP genes during both MHT and SHT-P treatment  
267 suggests that STPs might serve as both sensors for priming induction and executors of the priming response,  
268 possibly facilitating protein solubility and disaggregation.

269 Our results highlight the importance of priming in mediating the heat adaptation of fungi and advance our  
270 understanding of how psychrophilic fungi manage to survive in hot environments. We demonstrated the  
271 potential application of this knowledge by subverting the priming response through a protocol involving a  
272 series of temperature shifts, which eliminated the fungus and prevented disease development. A deeper  
273 understanding of specific elements that regulate priming, such as the mode of action of STPs and a system-  
274 level understanding of the priming response, will improve our ability to target this mechanism for disease  
275 management.

276

## 277 **Materials and Methods**

### 278 **Fungal cultures**

279 *B. cinerea* strain B05.10 and derived transgenic strains were routinely cultured on potato dextrose agar (PDA,  
280 Acumedia) or suspended in potato dextrose broth (PDB) at 22°C under continuous fluorescent light  
281 supplemented with near UV light. Additional media that were used for specific experiments included malt

282 medium (5 g glucose, 15 g malt extract, 1 g peptone, 1 g casamino acids) and GB5-Glc medium (Gamborg B5  
283 with vitamins and 2% glucose, Duchefa Biochemie).

#### 284 **Germination, colony growth, and germ tube elongation**

285 *Germination.* Fungi were cultured on PDA for 7 d. Spores were collected by washing with PDB and filtered  
286 through two layers of Miracloth, and the spore density was adjusted to  $5 \times 10^5$ /ml. A 20- $\mu$ l droplet of spore  
287 suspension was placed on a coverslip and incubated under continuous light at the specified temperature and  
288 time. After incubation, the slides were visualized under a light microscope and germination rates were scored.  
289 Each experiment was repeated at least four times, with >200 randomly selected spores each time.

290 *Colony growth.* Cultures were initiated from 4-mm plugs that were cut from the edge of a 2-day-old colony. The  
291 plugs were placed in the center of a Petri dish containing PDA and incubated at the indicated temperatures  
292 under continuous light. Colony diameter was recorded after 3 d, the diameter of the initial inoculation plug (4  
293 mm) was subtracted, and radial growth was calculated. Each experiment was performed with three replications  
294 (3 plates per treatment) and was repeated three times.

295 *Germ tube elongation.* A 20- $\mu$ l droplet of spore suspension ( $5 \times 10^4$ /ml) was placed on a coverslip and  
296 incubated under the indicated conditions. After incubation, the slides were visualized under a light microscope  
297 and GT length was recorded. Each experiment was repeated three times, with more than 120 randomly  
298 selected GTs each time.

299 *Germination after heat stress.* Fungi were cultured on PDA for 7 d to allow mycelia and spores to develop. The  
300 plates were transferred to 37°C or 42°C for the indicated time. After heat treatment, spores were collected into  
301 PDB, and spore density was adjusted to 200 spores/ml. To determine germination rates, a 5- $\mu$ l spore  
302 suspension was placed on a small (1 cm<sup>2</sup>) PDA cube and incubated at 22°C for 72 h. The number of germinated  
303 and un-germinated spores was scored, and germination rate was calculated. Each experiment was performed  
304 at least three times with >200 spores per treatment.

#### 305 **Priming-related assays**

306 *Cell death.* Spores ( $2 \times 10^5$ /ml PDB) were placed on a coverslip, incubated at 22°C or 29°C for 12 h under  
307 continuous light and transferred to 37°C. Following incubation at 37°C, the GTs were stained with 10  $\mu$ g/ml PI  
308 for 15 min. Samples were visualized under a Zeiss Axio imager M1 fluorescence microscope using a rhodamine  
309 filter. The number of dead cells (PI-positive) was counted, and the proportion of dead cells was calculated. Each  
310 experiment was repeated at least three times with more than 120 randomly selected GTs each time.

311 *Membrane potential.* GTs were suspended in PBS containing 100  $\mu$ M DiBAC4(5) (Interchim), incubated for 15  
312 min at room temperature and visualized under a fluorescence microscope using a rhodamine filter. Images  
313 were captured using Zeiss AxioCam MRm camera. The fluorescence intensity of each germ tube was quantified  
314 using ImageJ, and the mean signal intensity of each treatment was calculated. The experiment was repeated  
315 four times with at least 50 randomly selected GTs each time.

316 *Recovery of colony growth after heat shock.* Colonies were initiated by placing a 5- $\mu$ l droplet of spore  
317 suspension ( $5 \times 10^5$ /ml) in the center of a Petri dish containing PDA. The plates were incubated under  
318 continuous light at 22°C or 29°C for 12 h and then at 37°C for 6 or 9 h. After heat treatment, the cultures were  
319 incubated at 22°C for 3 d and the colony diameter measured. Each experiment was repeated six times with five  
320 replications per treatment.

321 *High/low temperature cycles.* Spores ( $2 \times 10^5$ /ml) were incubated in liquid GB5-Glc on a coverslip at 22°C for 6  
322 h, transferred to 42°C for 2 h (heat treatment) and incubated at 22°C for 22 h (recovery). The cycle was  
323 repeated three times, and the levels of cell death were determined after each cycle by PI staining. The  
324 experiments were repeated at least three times with >300 randomly selected GTs each time.

325 *Infection assays.* Pathogenicity assays were performed using the first two leaves of 8-day-old French bean  
326 (*Phaseolus vulgaris* L. genotype N9059) plants as described previously (45). The leaves were inoculated with  
327 7.5- $\mu$ l droplets of a spore suspension containing  $2 \times 10^5$  spores/ml in GB5-Glc. The plants were incubated in  
328 closed boxes at 100% relative humidity, and disease levels were estimated visually by scoring lesion diameter  
329 at the indicated time post inoculation.

330 For priming experiments, inoculated plants were incubated at 22°C or 29°C for 16 h and transferred to 37°C for  
331 4 or 8 h. Following the heat treatment, the plants were incubated at 22°C for 3 d and the lesion diameter  
332 measured. Each experiment was repeated at least four times with three plants (two leaves per plant) per  
333 treatment.

334 To evaluate the effects of high/low temperature cycles on pathogenicity, inoculated plants were first incubated  
335 at 22°C for 6 h to allow spores to germinate and produce GTs, then transferred to 42°C for 2 h, followed by 22°C  
336 for 22 h. This cycle was repeated three times. The plants were then incubated at 22°C for three more days. The  
337 experiments were repeated five times with three plants (two leaves per plant) per treatment.

### 338 **DNA and RNA extraction and analysis**

339 Genomic DNA extraction was performed using Extract-N-Amp™ Tissue PCR Kits (Sigma/Aldrich). For cDNA  
340 synthesis, total RNA was treated with DNase I (Thermo Scientific) and first-strand cDNA was synthesized from  
341 1 $\mu$ g of DNA-free RNA using a RevertAid First Strand cDNA Synthesis Kit (Thermo Scientific). qRT-PCR was  
342 performed with SYBR Premix Ex Taq II (Takara, Dalian, China) using a StepOne (Applied Biosystems) Real-time  
343 PCR instrument (Applied Biosystems). Relative fold changes of mRNA levels determined by RNA-seq were  
344 normalized to the expression of the ribosomal protein gene *bcrsm18*, which has relatively stable mRNA  
345 expression.

### 346 **RNA-seq and analysis**

347 *Biological materials.* *B. cinerea* cultures were produced by spreading 500  $\mu$ l of spore suspension ( $10^7$ /ml) on a  
348 cellophane-covered PDA plate. Treatments (Table S1) included incubation at 22°C or 29°C for 10 h (OT and

349 MHT, respectively), and 22°C or 29°C for 8 h followed by 37°C for 2 h (SHT and SHT-P, respectively). GTs were  
350 collected from the plates by washing with water, centrifuged, separated into two 1.5-ml Eppendorf tubes,  
351 flash-frozen in liquid nitrogen and stored at –80°C. RNA was extracted from one tube per sample, with four  
352 biological replications per treatment and a total of 16 samples. Samples were ground in liquid nitrogen with a  
353 mortar and pestle, and RNA was extracted with TRIzol reagent (Sigma-Aldrich) according to the manufacturer’s  
354 instructions.

355 *RNA quality, library preparation, and RNA-seq.* cDNA libraries were prepared using a NEBNext Ultra II RNA  
356 Library Prep Kit (NEB). RNA and cDNA quality and quantity were evaluated by performing a Qubit assay with  
357 the TapeStation 4200 system (Agilent Technologies). Sequencing libraries were constructed with barcodes  
358 using NEBNext multiplex oligos for Illumina (NEB). Pooled libraries of 16 samples were sequenced at the Faculty  
359 of Life Sciences, Tel Aviv University, Israel in one lane of the Illumina NextSeq 500 platform using the 75-bp  
360 single-end RNA-seq protocol.

361 Raw reads were uploaded to the Partek Flow commercial tool (build version 9.0.20.0804), and 3'-end low-  
362 quality bases (<Phred 20) were trimmed. An average of more than 24 million reads per sample was obtained,  
363 with high quality (Phred score > 34). The number of reads after QC and trimming ranged from 19,604,233 to  
364 29,043,828 (Table S2). The clean reads were mapped to the *B. cinerea* reference genome (assembly  
365 ASM14353v4, <https://www.ncbi.nlm.nih.gov/genome/494>) using STAR-2.7.3a. Over 97% of the reads in each  
366 sample were mapped to the *B. cinerea* genome (Table S2), and 11,219 of the 11,700 annotated *B. cinerea*  
367 strain B05.10 genes were identified. Principal component analysis (PCA) separated the samples into four  
368 distinct clusters based on treatment (Fig. S3a). RT-PCR analysis of eight genes validated the RNA-seq results,  
369 with highly similar expression patterns, confirming the accuracy of the RNA-seq data (Fig. S3b and S3c).  
370 Quantification and normalization of gene expression were performed using the Partek E/M algorithm and  
371 DESeq2, respectively. Gene expression values were calculated as fragments per kilobase per million (FRKM).  
372 Principal coordinate analysis and heatmap analysis were performed using the Partek Flow tool or R software.  
373 Identification of DEGs was performed with the DESeq2 package with cutoffs of pFDR < 0.05 and |fold change|  
374 (FC) ≥ 2 or ≥ 5. GO enrichment analysis of the DEGs was performed using the FungiDB platform  
375 (<https://fungidb.org/fungidb/app>) (46).

### 376 **Isolation of soluble and aggregated proteins**

377 To isolate soluble and aggregated proteins, fungal material was produced as described for the RNA-seq  
378 experiment, except that the initial incubation at 22°C or 29°C was performed for 14 h instead 8 h to allow the  
379 accumulation of sufficient biomass. Soluble and aggregated proteins were extracted from the samples  
380 according to Koplin and Brennan (47, 48) with some modifications. At the end of the heat treatments, the  
381 fungal biomass was collected (0.8–1.6 g), ground to a fine powder in liquid nitrogen and suspended in 1.2 ml of  
382 freshly prepared protein extraction buffer (20 mM Na-phosphate, pH 6.8, 10 mM DTT, 1 mM EDTA, 0.1%

383 Tween, 1 mM PMSF, 1× Mini Protease Inhibitor Cocktail, Roche). The samples were centrifuged at 3000g for 6  
384 min at 4°C using a tabletop centrifuge, and each supernatant was transferred to a new 1.5-ml Eppendorf tube.  
385 The samples were centrifuged at 5,000g for 5 min at 4°C to precipitate remnants of cellular debris, and the  
386 supernatant was transferred to a new tube. A sample of the protein extract was measured in a  
387 spectrophotometer, and the amount of total protein in each sample was calculated using a 1 mg/ml standard  
388 sample of bovine serum albumin (Sigma-Aldrich). To separate the soluble and aggregated proteins, extracted  
389 proteins were centrifuged at 16,000g for 20 min at 4°C, and the supernatant was carefully removed,  
390 transferred to a new tube and stored at –80°C as the soluble protein fraction. The pellet was washed twice  
391 with 300 µl sodium phosphate buffer (20 mM Na-phosphate pH 6.8, 1 mM PMSF, 1× Mini Protease Inhibitor  
392 Cocktail, Roche) with centrifugation at 16,000g for 20 min between washes. The supernatant was removed and  
393 the clean pellet stored at –80°C as the protein aggregate fraction.

#### 394 **SDS-PAGE and proteomic analyses**

395 For soluble proteins, samples were mixed with protein loading buffer and boiled for 5 min. For protein  
396 aggregates, the protein pellet was dissolved in 20 µl of 8 M urea, mixed with protein loading buffer and boiled  
397 for 5 min. The amounts of proteins were normalized to represent an equal amount of total proteins in all  
398 samples. The protein samples were separated by SDS-PAGE and stained with Coomassie brilliant blue.

399 Proteomics analysis was performed at the Smoler Proteomics Center, the Technion, Israel as previously  
400 described (49). Samples were incubated at 60°C for 30 min to reduce the volume, mixed with 35 mM  
401 iodoacetamide in 400 mM ammonium bicarbonate and incubated at room temperature in the dark for 30 min.  
402 The samples were then mixed with 2 M urea, 80 mM ammonium bicarbonate solution and digested with  
403 modified trypsin (Promega) by overnight incubation at a 1:50 enzyme-to-substrate ratio at 37°C. The resulting  
404 tryptic peptides were desalted using C<sub>18</sub> tips (Harvard), dried and resuspended in 0.1% formic acid. The samples  
405 were analyzed by LC-MS/MS using a Q Exactive Plus mass spectrometer (Thermo) fitted with a capillary high-  
406 performance liquid chromatograph (HPLC; easy nLC 1000; Thermo). The peptides were loaded onto a  
407 homemade capillary column (25-cm, 75-µm internal diameter) packed with Reprosil C<sub>18</sub> Aqua (Dr. Maisch  
408 GmbH, Ammerbuch, Germany) in solvent A (0.1% formic acid in water). The peptide mixture was resolved with  
409 a linear gradient (5%–28%) of solvent B (95% acetonitrile with 0.1% formic acid) for 105 min, followed by a 15-  
410 min gradient of 28%–95% and 15 min at 95% acetonitrile with 0.1% formic acid in water at a flow rate of 0.15  
411 µl/min. Mass spectrometry was performed in positive mode ( $m/z$  350 to 1,800; resolution 70,000) using a  
412 repetitively full MS scan, followed by collision-induced dissociation (high-energy collision dissociation [HCD], at  
413 a normalized collision energy of 35) of the 10 most dominant ions (>1 charges) selected from the first MS scan.  
414 The AGC settings were  $3 \times 10^6$  for the full MS scan and  $1 \times 10^5$  for the MS/MS scans. The intensity threshold for  
415 triggering MS/MS analysis was  $1 \times 10^4$ . A dynamic exclusion list was enabled with an exclusion duration of 20 s.

416 The mass spectrometry data from all three replications were analyzed using MaxQuant software v.1.5.2.8. (50)  
417 for peak identification and quantitation using the Andromeda search engine, which searches for tryptic  
418 peptides against the B05.10 UniProt database (51), with a mass tolerance of 20 ppm for both the precursor  
419 masses and fragment ions. Oxidation on methionine and protein N-terminus acetylation were accepted as  
420 variable modifications, and carbamidomethyl on cysteine was accepted as a static modification, as the  
421 percentage of carbamylation was low. Minimal peptide length was set to 6 amino acids, and a maximum of two  
422 missed cleavages were allowed. Peptide- and protein-level false discovery rates (FDRs) were filtered to 1%  
423 using the target decoy strategy. Protein tables were filtered to eliminate identifications from the reverse  
424 database and common contaminants and single peptide identifications. The data were quantified by SILAC  
425 analysis using the same software. H/L ratios for all peptides belonging to a particular protein species were  
426 pooled, providing a ratio for each protein.

#### 427 **Protease inhibitor assay**

428 A 20- $\mu$ l droplet of spore suspension ( $10^5$ /ml) was placed on a coverslip and incubated at 29°C for 8 h. The  
429 suspension medium was carefully removed and replaced with fresh PDB supplemented with 2 $\times$  protease  
430 inhibitor (Mini Protease Inhibitor Cocktail, Roche), 0.5 mM or 2 mM PMSF (Sigma-Aldrich), or an equal volume  
431 of PDB (control treatment). The samples were incubated at 29°C or 37°C for 4 h, the GTs were stained with PI,  
432 and the death rate was calculated. Each experiment was repeated at least three times with more than 150  
433 randomly selected GTs per sample.

#### 434 **Generation of serine protease deletion strains**

435 Deletion strains were generated using a marker-free CRISPR-Cas9 genome editing method (52) with two  
436 sgRNAs per gene. All CRISPR-Cas9 reagents were purchased from Integrated DNA Technology (IDT). Selection  
437 and design of sgRNAs were conducted with a sgRNA design web platform (<http://grna.ctegd.uga.edu/>). To  
438 assemble a single sgRNA duplex (33 $\mu$ M), 0.2 nm each of Alt-R CRISPR-Cas9 crRNA (2 $\mu$ l) and Alt-R CRISPR-Cas9  
439 tracrRNA (2 $\mu$ l) were mixed with Nuclease-Free Duplex Buffer (2  $\mu$ l). The mixture was incubated for 5 min at  
440 95°C and allowed to cool at room temperature. To assemble a Cas9/sgRNA ribonucleoprotein (RNP) complex, 3  
441  $\mu$ g Cas9 (3  $\mu$ l), 33  $\mu$ M sgRNA duplex (2  $\mu$ l) and 5  $\mu$ l of Cas9 working buffer were mixed and incubated at 37°C for  
442 30 min.

443 Transformation of *B. cinerea* was performed according to Leisen et al. (53). Briefly, protoplasts were incubated  
444 with 2  $\mu$ g pTEL-Fen telomeric plasmid (52) and two RNP complexes per gene, each containing 3  $\mu$ g Cas9 and 1  
445  $\mu$ g sgRNA. The protoplasts were mixed with 50 ml of liquified SH agar medium supplemented with 30 mg/l  
446 fenhexamid (Fen; Teldor), and the mixture was dispensed into 90-mm Petri dishes. The plates were incubated  
447 at 22°C for 3 d, and Fen-resistant colonies were collected. The colonies were transferred to PDA plates without  
448 selection to allow rapid growth and the loss of pTEL-Fen selection. Hyphal tips from fast-growing isolates were

449 transferred to fresh PDA plates, allowed to grow for 4 d and subjected to DNA extraction and PCR analysis to  
450 verify the deletion. A single round of single spore isolation was performed, followed by DNA extraction and PCR  
451 analysis to verify that the strains were homokaryotic for the deletion. To generate strains with deletions of  
452 multiple genes, purified strains were selected and transformed with RNP complexes for additional genes. For  
453 each strain, three to four individual isolates were selected and subjected to initial phenotyping by examining  
454 growth morphology, sporulation, spore germination, and the priming responses of GTs.

#### 455 **Biomass production**

456 Liquid cultures were initiated by inoculating 50 ml malt medium with  $10^6$  spores/ml. The cultures were  
457 incubated for 12 h at 22°C with shaking at 150 rpm under continuous light and transferred to 29°C. After 12 h  
458 incubation with shaking at 29°C, two samples of 10 ml each were removed, placed in 15-ml tubes and  
459 centrifuged at 4000g for 15min. The supernatant was discarded and the fresh weight was measured. The tubes  
460 with pellets were incubated in an oven at 55°C for 24 h and the dry weight measured. After removing 20-ml  
461 aliquots, the remaining cultures were transferred to 37°C and incubated 12 h, followed by 22°C for 24 h. A 20-  
462 ml aliquot was removed from each sample, and the fresh and dry weights were measured. Each experiment  
463 was repeated three times with two replications per treatment.

#### 464 **Statistical analysis**

465 The statistical significance between means of treatments was evaluated by Student's *t*-test (two-tailed *t*-test).  
466 In all graphs, results represent the mean values of at least three independent experiments, each with at least  
467 three replications per treatment. Details of statistical analyses are presented in the figure legends and figures  
468 were generated using Prism software (GraphPad 8.0).

469

470 **Funding:** This work was supported by Israel Science Foundation grant # 191/22 to A.S. M.Z. is supported by  
471 China Scholarship Council fellowship. **Author contributions:** Conceptualization: A.S. and M.Z. Methodology:  
472 A.S., M.H., and M.Z. Investigation: M.Z., N.T., and T.L. Visualization: M.Z. and M.C. Supervision: A.S. Writing—  
473 original draft: A.S. and M.Z. Writing—review & editing: A.S. and M.Z. **Declaration of Interest:** The authors  
474 declare that they have no competing interests. **Data and materials availability:** All data needed to evaluate the  
475 conclusions in the paper are present in the paper and/or the supplementary materials. RNA sequencing data  
476 have been uploaded to NCBI and will be available once granted a project accession number. The mass  
477 spectrometry proteomics data have been deposited in the ProteomeXchange Consortium via the PRIDE (54)  
478 partner repository with the dataset identifier PXD037173. Additional data are available from the corresponding  
479 authors upon request.

480

#### 481 **References**

- 482 1. Vergheze J, Abrams J, Wang Y, Morano KA. 2012. Biology of the Heat Shock Response and Protein  
483 Chaperones: Budding Yeast (*Saccharomyces cerevisiae*) as a Model System. *Microbiol Mol Biol Rev*  
484 76:115–158.
- 485 2. Mühlhofer M, Berchtold E, Stratil CG, Csaba G, Kunold E, Bach NC, Sieber SA, Haslbeck M, Zimmer R,

- 486 Buchner J. 2019. The Heat Shock Response in Yeast Maintains Protein Homeostasis by Chaperoning and  
487 Replenishing Proteins. *Cell Rep* 29:4593-4607.e8.
- 488 3. Sethi R, Iyer SS, Das E, Roy I. 2018. Discrete roles of trehalose and Hsp104 in inhibition of protein  
489 aggregation in yeast cells. *FEMS Yeast Res* 18:1–11.
- 490 4. Sathyanarayanan U, Musa M, Bou Dib P, Raimundo N, Milosevic I, Krisko A. 2020. ATP hydrolysis by  
491 yeast Hsp104 determines protein aggregate dissolution and size in vivo. *Nat Commun* 11:5226.
- 492 5. Wang ZX, Zhou XZ, Meng HM, Liu YJ, Zhou Q, Huang B. 2014. Comparative transcriptomic analysis of the  
493 heat stress response in the filamentous fungus *Metarhizium anisopliae* using RNA-Seq. *Appl Microbiol*  
494 *Biotechnol* 98:5589–5597.
- 495 6. Tyedmers J, Mogk A, Bukau B. 2010. Cellular strategies for controlling protein aggregation. *Nat Rev Mol*  
496 *Cell Biol* 11:777–788.
- 497 7. Richter K, Haslbeck M, Buchner J. 2010. The Heat Shock Response: Life on the Verge of Death. *Mol Cell*  
498 40:253–266.
- 499 8. Puri N, Karzai AW. 2017. HspQ Functions as a Unique Specificity-Enhancing Factor for the AAA+ Lon  
500 Protease. *Mol Cell* 66:672-683.e4.
- 501 9. Basta DW, Angeles-Albores D, Spero MA, Cierniecki JA, Newman DK. 2020. Heat-shock proteases  
502 promote survival of *Pseudomonas aeruginosa* during growth arrest. *Proc Natl Acad Sci U S A* 117:4358–  
503 4367.
- 504 10. Saad S, Cereghetti G, Feng Y, Picotti P, Peter M, Dechant R. 2017. Reversible protein aggregation is a  
505 protective mechanism to ensure cell cycle restart after stress. *Nat Cell Biol* 19:1202–1213.
- 506 11. Wallace EWJ, Kear-Scott JL, Pilipenko E V., Schwartz MH, Laskowski PR, Rojek AE, Katanski CD, Riback JA,  
507 Dion MF, Franks AM, Airoidi EM, Pan T, Budnik BA, Drummond DA. 2015. Reversible, Specific, Active  
508 Aggregates of Endogenous Proteins Assemble upon Heat Stress. *Cell* 162:1286–1298.
- 509 12. Escusa-Toret S, Vonk WIM, Frydman J. 2013. Spatial sequestration of misfolded proteins by a dynamic  
510 chaperone pathway enhances cellular fitness during stress. *Nat Cell Biol* 15:1231–1243.
- 511 13. Cherkasov V, Hofmann S, Druffel-Augustin S, Mogk A, Tyedmers J, Stoeklin G, Bukau B. 2013.  
512 Coordination of translational control and protein homeostasis during severe heat stress. *Curr Biol*  
513 23:2452–2462.
- 514 14. Kroschwald S, Munder MC, Maharana S, Franzmann TM, Richter D, Ruer M, Hyman AA, Alberti S. 2018.  
515 Different Material States of Pub1 Condensates Define Distinct Modes of Stress Adaptation and Recovery.  
516 *Cell Rep* 23:3327–3339.
- 517 15. Miller SBM, Mogk A, Bukau B. 2015. Spatially organized aggregation of misfolded proteins as cellular  
518 stress defense strategy. *J Mol Biol* 427:1564–1574.
- 519 16. Gallardo P, Salas-Pino S, Daga RR. 2021. Reversible protein aggregation as cytoprotective mechanism  
520 against heat stress. *Curr Genet* 67:849–855.
- 521 17. Hartl FU, Bracher A, Hayer-Hartl M. 2011. Molecular chaperones in protein folding and proteostasis.  
522 *Nature* 475:324–332.
- 523 18. Gibney PA, Lu C, Caudy AA, Hess DC, Botstein D. 2013. Yeast metabolic and signaling genes are required  
524 for heat-shock survival and have little overlap with the heat-induced genes. *Proc Natl Acad Sci U S A* 110.
- 525 19. Berry DB, Guan Q, Hose J, Haroon S, Gebbia M, Heisler LE, Nislow C, Giaever G, Gasch AP. 2011. Multiple  
526 means to the same end: The genetic basis of acquired stress resistance in yeast. *PLoS Genet* 7.
- 527 20. David B. Berry and Audrey P. Gasch. 2008. Stress-activated Genomic Expression Changes Serve a  
528 Preparative Role for Impending Stress in Yeast. *Mol Biol Cell* 19:4580–4587.
- 529 21. Hilker M, Schwachtje J, Baier M, Balazadeh S, Bäurle I, Geiselhardt S, Hinch DK, Kunze R, Mueller-  
530 Roeber B, Rillig MC, Rolff J, Romeis T, Schmölling T, Steppuhn A, van Dongen J, Whitcomb SJ, Wurst S,  
531 Zuther E, Kopka J. 2016. Priming and memory of stress responses in organisms lacking a nervous system.  
532 *Biol Rev* 91:1118–1133.
- 533 22. Wesener F, Tietjen B. 2019. Primed to be strong, primed to be fast: Modeling benefits of microbial  
534 stress responses. *FEMS Microbiol Ecol* 95:1–9.
- 535 23. Andrade-Linares DR, Lehmann A, Rillig MC. 2016. Microbial stress priming: A meta-analysis. *Environ*



- 536 Microbiol 18:1277–1288.
- 537 24. Harish E, Osherov N. 2022. Fungal Priming: Prepare or Perish. *J Fungi* 8.
- 538 25. Khan A, Khan V, Pandey K, Sopory SK, Sanan-Mishra N. 2022. Thermo-Priming Mediated Cellular  
539 Networks for Abiotic Stress Management in Plants. *Front Plant Sci* 13:1–29.
- 540 26. Liu H, Able AJ, Able JA. 2022. Priming crops for the future: rewiring stress memory. *Trends Plant Sci*  
541 27:699–716.
- 542 27. Wesener F, Szymczak A, Rillig MC, Tietjen B. 2021. Stress priming affects fungal competition - evidence  
543 from a combined experimental and modelling study. *Environ Microbiol* 23:5934–5945.
- 544 28. Szymczak A, Ryo M, Roy J, Rillig MC. 2020. Diversity of Growth Responses of Soil Saprobic Fungi to  
545 Recurring Heat Events. *Front Microbiol* 11:1–8.
- 546 29. Xu Y, Li L, Li J, Liu Q. 2016. Structural and biological function of NYD-SP15 as a new member of cytidine  
547 deaminases. *Gene* 583:36–47.
- 548 30. Lomakin IB, Dmitriev SE, Steitz TA. 2019. Crystal structure of the DENR-MCT-1 complex revealed zinc-  
549 binding site essential for heterodimer formation. *Proc Natl Acad Sci U S A* 116:528–533.
- 550 31. Aguado J, d’Adda di Fagagna F, Wolvetang E. 2020. Telomere transcription in ageing. *Ageing Res Rev*  
551 62:101115.
- 552 32. Sharma A, Radha Kishan K V. 2011. Serine protease inhibitor mediated peptide bond re-synthesis in  
553 diverse protein molecules. *FEBS Lett* 585:3465–3470.
- 554 33. Burchacka E, Pięta P, Łupicka-Słowik A. 2022. Recent advances in fungal serine protease inhibitors.  
555 *Biomed Pharmacother* 146.
- 556 34. Misseri G, Ippolito M, Cortegiani A. 2019. Global warming “heating up” the ICU through *Candida auris*  
557 infections: The climate changes theory. *Crit Care* 23:1–2.
- 558 35. Garcia-Solache MA, Casadevall A. 2010. Global warming will bring new fungal diseases for mammals.  
559 *MBio* 1.
- 560 36. Amselem J, Cuomo CA, van Kan JAL, Viaud M, Benito EP, Couloux A, Coutinho PM, de Vries RP, Dyer PS,  
561 Fillinger S, Fournier E, Gout L, Hahn M, Kohn L, Lapalu N, Plummer KM, Pradier JM, Quévillon E, Sharon  
562 A, Simon A, Have A, Tudzynski B, Tudzynski P, Wincker P, Andrew M, Anthouard V, Beever RE, Beffa R,  
563 Benoit I, Bouzid O, Brault B, Chen Z, Choquer M, Collémare J, Cotton P, Danchin EG, Da Silva C, Gautier A,  
564 Giraud C, Giraud T, Gonzalez C, Grossetete S, Güldener U, Henrissat B, Howlett BJ, Kodira C, Kretschmer  
565 M, Lappartient A, Leroch M, Levis C, Mauceli E, Neuvéglise C, Oeser B, Pearson M, Poulain J, Poussereau  
566 N, Quesneville H, Rasclé C, Schumacher J, Ségurens B, Sexton A, Silva E, Sirven C, Soanes DM, Talbot NJ,  
567 Templeton M, Yandava C, Yarden O, Zeng Q, Rollins JA, Lebrun MH, Dickman M. 2011. Genomic analysis  
568 of the necrotrophic fungal pathogens *sclerotinia sclerotiorum* and *botrytis cinerea*. *PLoS Genet* 7.
- 569 37. Dean R, Van Kan JAL, Pretorius ZA, Hammond-Kosack KE, Di Pietro A, Spanu PD, Rudd JJ, Dickman M,  
570 Kahmann R, Ellis J, Foster GD. 2012. The Top 10 fungal pathogens in molecular plant pathology. *Mol*  
571 *Plant Pathol* 13:414–430.
- 572 38. Page MJ, Di Cera E. 2008. Serine peptidases: Classification, structure and function. *Cell Mol Life Sci*  
573 65:1220–1236.
- 574 39. Muszewska A, Stepniewska-Dziubinska MM, Steczkiewicz K, Pawlowska J, Dziedzic A, Ginalski K. 2017.  
575 Fungal lifestyle reflected in serine protease repertoire. *Sci Rep* 7:1–12.
- 576 40. Ramírez V, López A, Mauch-Mani B, Gil MJ, Vera P. 2013. An Extracellular Subtilase Switch for Immune  
577 Priming in *Arabidopsis*. *PLoS Pathog* 9.
- 578 41. Clausen T, Kaiser M, Huber R, Ehrmann M. 2011. HTRA proteases: Regulated proteolysis in protein  
579 quality control. *Nat Rev Mol Cell Biol* 12:152–162.
- 580 42. Tennstaedt A, Pöpsel S, Truebestein L, Hauske P, Brockmann A, Schmidt N, Irle I, Sacca B, Niemeyer CM,  
581 Brandt R, Ksiezak-Reding H, Tirniceriu AL, Egensperger R, Baldi A, Dehmelt L, Kaiser M, Huber R, Clausen  
582 T, Ehrmann M. 2012. Human high temperature requirement serine protease A1 (HTRA1) degrades tau  
583 protein aggregates. *J Biol Chem* 287:20931–20941.
- 584 43. Trentini DB, Suskiewicz MJ, Heuck A, Kurzbauer R, Deszcz L, Mechtler K, Clausen T. 2016. Arginine  
585 phosphorylation marks proteins for degradation by a Clp protease. *Nature* 539:48–53.

- 586 44. Illigmann A, Thoma Y, Pan S, Reinhardt L, Brötz-Oesterhelt H. 2021. Contribution of the clp protease to  
587 bacterial survival and mitochondrial homeostasis. *Microb Physiol* 31:260–279.
- 588 45. Bi K, Scalschi L, Jaiswal N, Mengiste T, Fried R, Sanz AB, Arroyo J, Zhu W, Masrati G, Sharon A. 2021. The  
589 *Botrytis cinerea* Crh1 transglycosylase is a cytoplasmic effector triggering plant cell death and defense  
590 response. *Nat Commun* 12:1–15.
- 591 46. Basenko EY, Pulman JA, Shanmugasundram A, Harb OS, Crouch K, Starns D, Warrenfeltz S, Aurrecochea  
592 C, Stoeckert CJ, Kissinger JC, Roos DS, Hertz-Fowler C. 2018. FungiDB: An integrated bioinformatic  
593 resource for fungi and oomycetes. *J Fungi* 4:1–28.
- 594 47. Brennan CM, Vaites LP, Wells JN, Santaguida S, Paulo JA, Storchova Z, Harper JW, Marsh JA, Amon A.  
595 2019. Protein aggregation mediates stoichiometry of protein complexes in aneuploid cells. *Genes Dev*  
596 33:1031–1047.
- 597 48. Koplin A, Preissler S, Llina Y, Koch M, Scior A, Erhardt M, Deuerling E. 2010. A dual function for  
598 chaperones SSB-RAC and the NAC nascent polypeptide-associated complex on ribosomes. *J Cell Biol*  
599 189:57–68.
- 600 49. Nigam A, Ziv T, Oron-Gottesman A, Engelberg-Kulka H. 2019. Stress-Induced MazF-Mediated Proteins in  
601 *Escherichia coli*. *MBio* 10.
- 602 50. Cox J, Mann M. 2008. MaxQuant enables high peptide identification rates, individualized p.p.b.-range  
603 mass accuracies and proteome-wide protein quantification. *Nat Biotechnol* 26:1367–1372.
- 604 51. Bateman A, Martin MJ, Orchard S, Magrane M, Agivetova R, Ahmad S, Alpi E, Bowler-Barnett EH, Britto  
605 R, Bursteinas B, Bye-A-Jee H, Coetzee R, Cukura A, da Silva A, Denny P, Dogan T, Ebenezer TG, Fan J,  
606 Castro LG, Garmiri P, Georgiou G, Gonzales L, Hatton-Ellis E, Hussein A, Ignatchenko A, Insana G,  
607 Ishtiaq R, Jokinen P, Joshi V, Jyothi D, Lock A, Lopez R, Luciani A, Luo J, Lussi Y, MacDougall A, Madeira F,  
608 Mahmoudy M, Menchi M, Mishra A, Moulang K, Nightingale A, Oliveira CS, Pundir S, Qi G, Raj S, Rice D,  
609 Lopez MR, Saidi R, Sampson J, Sawford T, Speretta E, Turner E, Tyagi N, Vasudev P, Volynkin V, Warner K,  
610 Watkins X, Zaru R, Zellner H, Bridge A, Poux S, Redaschi N, Aimo L, Argoud-Puy G, Auchincloss A, Axelsen  
611 K, Bansal P, Baratin D, Blatter MC, Bolleman J, Boutet E, Breuza L, Casals-Casas C, de Castro E, Echioukh  
612 KC, Coudert E, Cuche B, Doche M, Dornevil D, Estreicher A, Famiglietti ML, Feuermann M, Gasteiger E,  
613 Gehant S, Gerritsen V, Gos A, Gruaz-Gumowski N, Hinz U, Hulo C, Hyka-Nouspikel N, Jungo F, Keller G,  
614 Kerhornou A, Lara V, Le Mercier P, Lieberherr D, Lombardot T, Martin X, Masson P, Morgat A, Neto TB,  
615 Paesano S, Pedruzzi I, Pilbout S, Pourcel L, Pozzato M, Pruess M, Rivoire C, Sigrist C, Sonesson K, Stutz A,  
616 Sundaram S, Tognolli M, Verbregue L, Wu CH, Arighi CN, Arminski L, Chen C, Chen Y, Garavelli JS, Huang  
617 H, Laiho K, McGarvey P, Natale DA, Ross K, Vinayaka CR, Wang Q, Wang Y, Yeh LS, Zhang J, Ruch P,  
618 Teodoro D. 2021. UniProt: the universal protein knowledgebase in 2021. *Nucleic Acids Res* 49:D480–  
619 D489.
- 620 52. Leisen T, Bietz F, Werner J, Wegner A, Schaffrath U, Scheuring D, Willmund F, Mosbach A, Scalliet G,  
621 Hahn M. 2020. CRISPR/Cas with ribonucleoprotein complexes and transiently selected telomere vectors  
622 allows highly efficient marker-free and multiple genome editing in *Botrytis cinerea* PLoS Pathogens.
- 623 53. Leisen T, Werner J, Pattar P, Safari N, Ymeri E, Sommer F, Schroda M, Suárez I, Collado IG, Scheuring D,  
624 Hahn M. 2022. Multiple knockout mutants reveal a high redundancy of phytotoxic compounds  
625 contributing to necrotrophic pathogenesis of *Botrytis cinerea*. *PLoS Pathog* 18:1–28.
- 626 54. Perez-Riverol Y, Bai J, Bandla C, García-Seisdedos D, Hewapathirana S, Kamatchinathan S, Kundu DJ,  
627 Prakash A, Frericks-Zipper A, Eisenacher M, Walzer M, Wang S, Brazma A, Vizcaino JA. 2022. The PRIDE  
628 database resources in 2022: A hub for mass spectrometry-based proteomics evidences. *Nucleic Acids*  
629 *Res* 50:D543–D552.
- 630  
631  
632  
633

634  
635  
636  
637  
638  
639

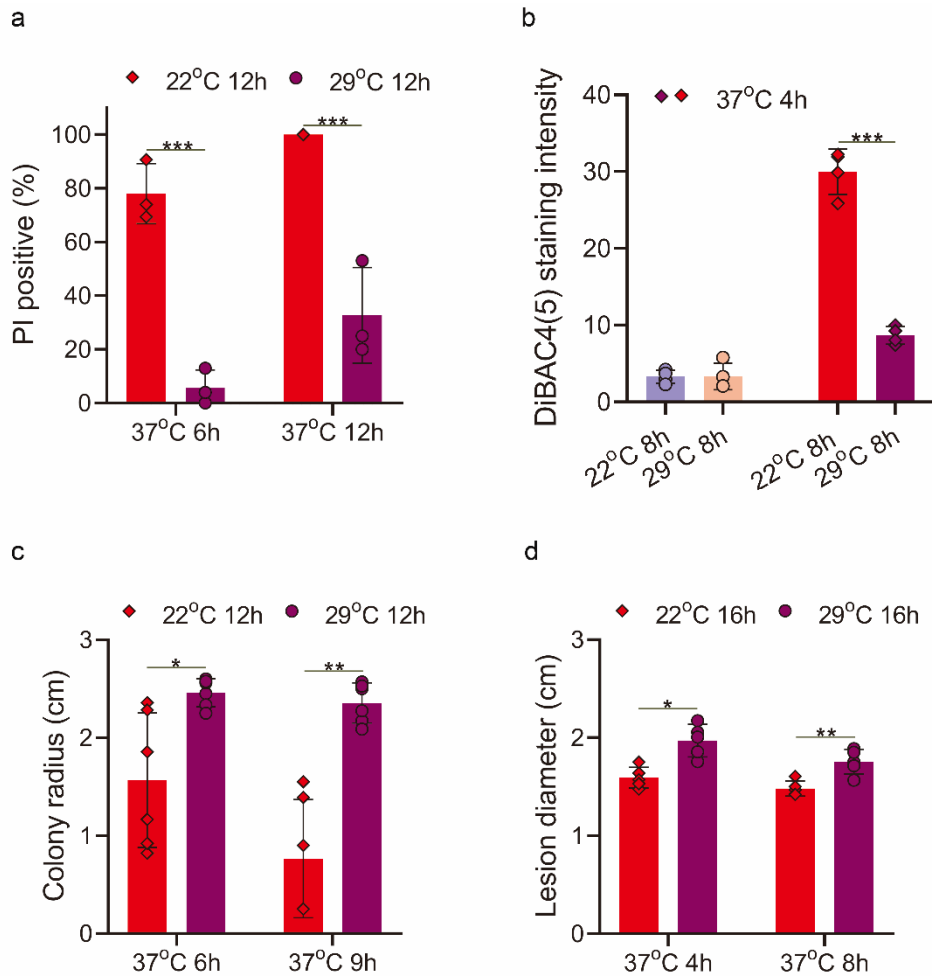

640  
641  
642  
643  
644  
645  
646  
647  
648  
649  
650  
651

**Fig 1. Pre-exposure to moderately high temperatures improves heat tolerance in *B. cinerea*.** **a.** Measurement of cell death by PI staining. GTs were produced at 22°C or 29°C, transferred to 37°C for 6 or 12 h and stained with PI, and the percentage of PI-positive (dead) GTs determined. **b.** Measurement of cell membrane potential. GTs were produced at 22°C or 29°C, transferred to 37°C for 4 h and stained with DiBAC4(5). Images were captured under a fluorescence microscope, and the cell membrane potential of each GT was quantified by measuring fluorescence intensity using ImageJ. Higher fluorescence intensity represents greater disruption of the membrane potential. **c.** Recovery of colony growth after exposure to severe high temperatures with or without priming. GTs were produced at 22°C (no priming) or 29°C (priming), transferred to 37°C for 6 or 9 h and moved back to 22°C. Colony diameter was recorded after 3 d at 22°C. **d.** Effect of priming on pathogenicity. Inoculated plants were incubated for 16 h at 22°C or 29°C, transferred to 37°C for 4 or 8 h and incubated at

652 22°C for 3 d, and the lesion diameter was recorded. Graphs represent three (a), four (b), five (d) and six (c)  
653 biological replications with overlaid individual data points. Values are presented as the mean of replicates  $\pm$  s.d.  
654 Statistical differences were determined according to unpaired two-tailed Student' t-test (\* $P < 0.05$ ; \*\* $P < 0.01$ ;  
655 \*\*\* $P < 0.001$ ).  
656  
657

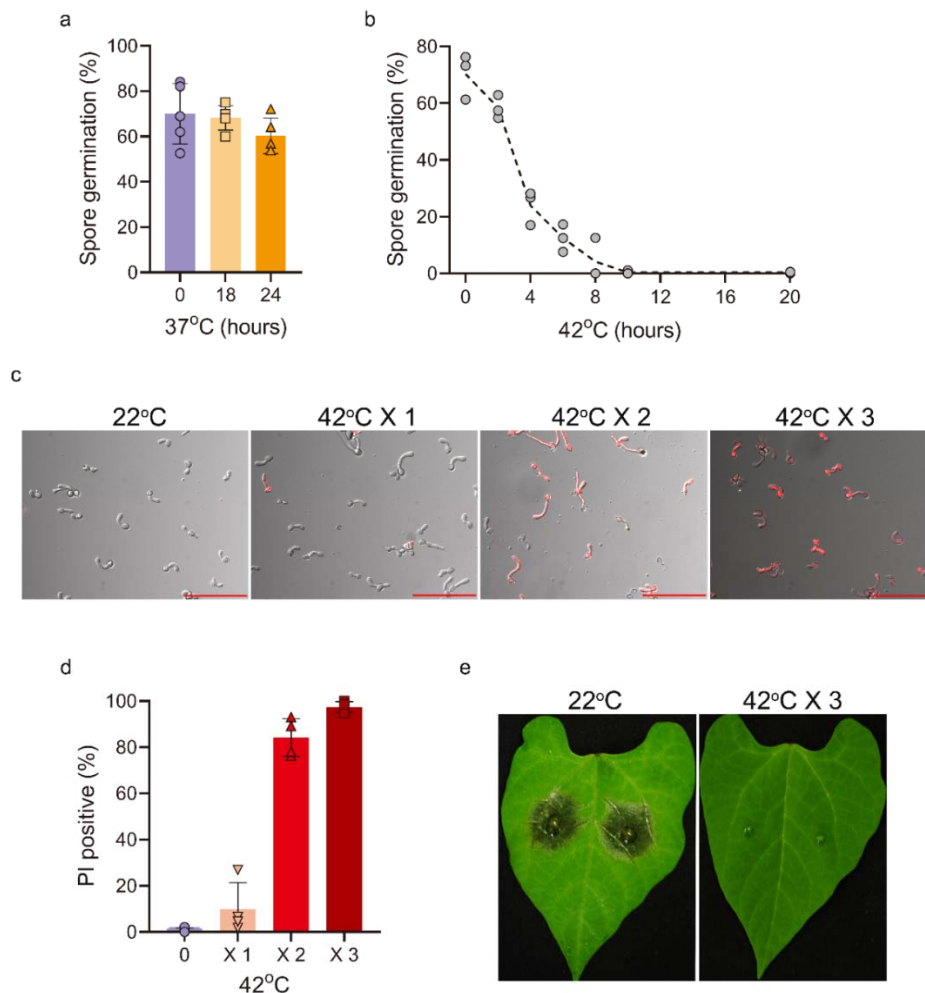

658  
659  
660 **Fig 2. Effects of different heat regimes on fungal viability and pathogenicity.** **a.** Spore germination after  
661 exposure to 37°C. Cultures were produced on PDA, seven-day-old cultures were exposed to 37°C for 18 or 24 h,  
662 spores were collected and incubated at 22°C for 3 d, and germination rates were determined. **b.** Cultures were  
663 treated at 42°C, and spores were collected at different time intervals and incubated at 22°C for 3 d and  
664 germination rates determined. **c.** Combined DIC and fluorescence (rhodamine filter) microscopic images of GTs  
665 following exposure to 42°C and staining with PI. Scale bars, 100  $\mu$ m. **d.** Increased cell death following repetitive  
666 cycles of exposure to 42°C and recovery at 22°C. Spores were germinated at 22°C for 6 h, and the GTs were  
667 transferred to 42°C for 2 h and then 22°C for 22 h. The cycle was repeated three times. GTs were stained with  
668 PI after each cycle, and the levels of cell death were determined. **e.** Effects of {42°C (2 h)/22°C (22 h)} cycles on  
669 pathogenicity. Inoculated *P. vulgaris* plants were incubated for 6 h at 22°C, transferred to 42°C for 2 h and  
670 incubated at 22°C for 22 h, and the cycle was repeated three times. Photographs were taken after the third  
671 cycle. Control plants were maintained at 22°C for the entire duration of the experiment. Graphs represent

672 three (b), four (c) and five (a) biological replications with overlaid individual data points. For a and d, values are  
673 presented as the mean of replicates  $\pm$  s.d.

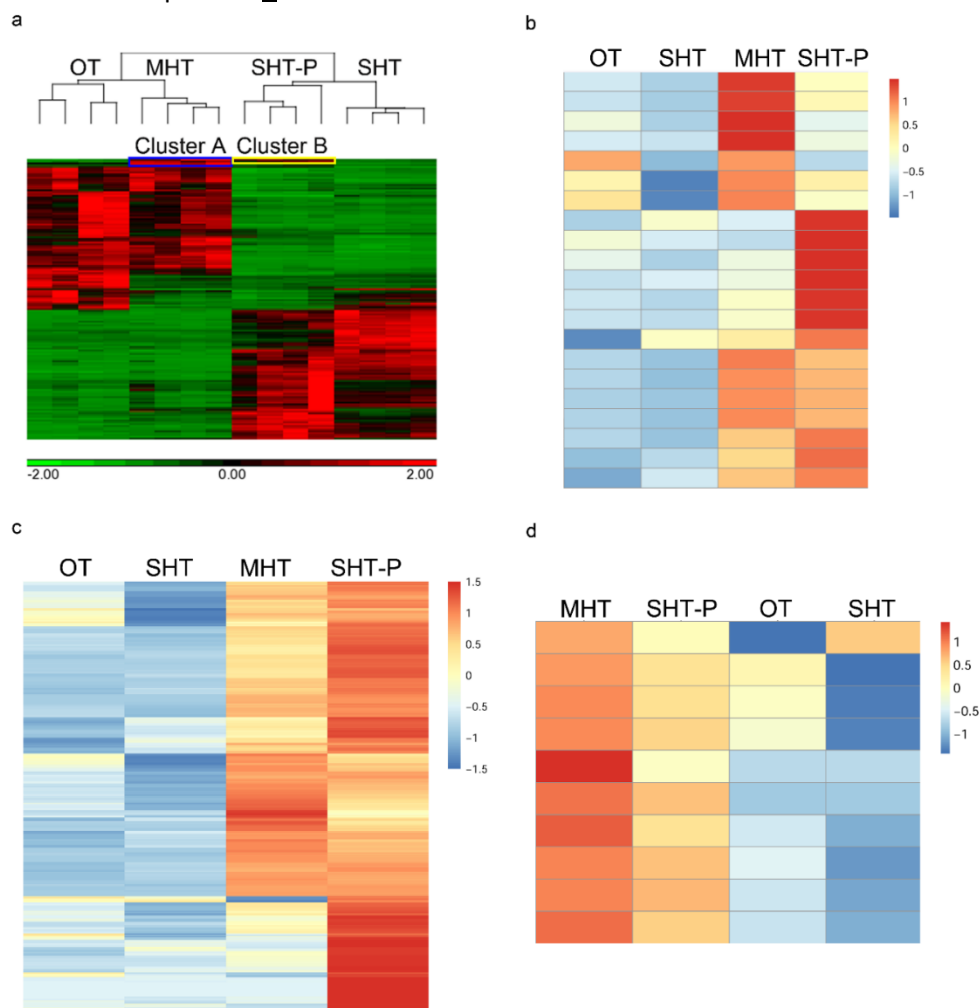

674  
675

676 **Fig 3. Priming-inducing genes and proteins.** a. Expression heatmap of the 1,329 DEGs (pFDR < 0.5, IFCI  $\geq$  5)  
677 identified by RNA-seq analysis. Genes in clusters A (blue box, 39 genes) and B (yellow box, 16 genes) were  
678 specifically upregulated under priming conditions: 23 out of 39 genes in cluster A were upregulated only at  
679 MHT, and genes in cluster B (16 genes) were upregulated at MHT and SHT-P. Six and four serine-type peptidase  
680 (GO:0008236) encoding genes were found in clusters A and B, respectively. b. Expression heatmap of the 21  
681 serine-type peptidase genes in the *B. cinerea* genome. The mean RPKM value of each treatment (four biological  
682 replications) was used to calculate the relative expression level (Z-score). The heatmap was generated using R.  
683 c. Expression heatmap of the 355 soluble candidate priming proteins. Two criteria were applied to select  
684 priming-associated candidates among the soluble proteins identified by proteomic analysis: (i)  $\{\log_2(\text{SHT-P}/\text{OT})\}$   
685  $-\{\log_2(\text{SHT}/\text{OT})\} \geq 1$ , to select proteins that are more abundant at SHT-P than at SHT; (ii)  $\log_2(\text{SHT-P}/\text{OT}) > 1$  and  
686  $\log_2(\text{SHT}/\text{OT}) < 1$ , to select proteins that are more abundant at SHT-P but not at SHT compared to OT. d.  
687 Expression heatmap of the 10 serine-type peptidases identified by proteomic analysis ( $q$ -value < 0.05, IFCI  $\geq$  2).  
688 The mean  $\log_2$ LFQ value of each protein in each treatment (three biological replications) was used to calculate  
689 the relative expression level (Z-score) and to generate the heatmaps in c and d using R.

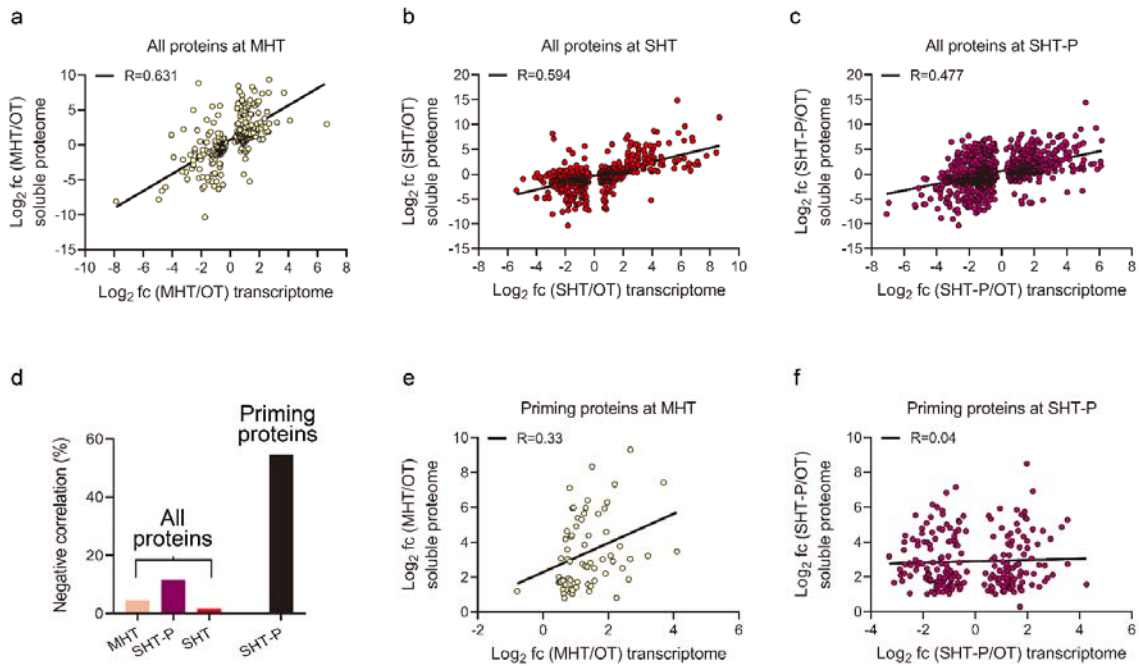

690  
691

692 **Fig 4. Correlations between changes in gene expression and protein levels.** a-c. Correlation between gene  
693 expression (pFDR < 0.05) and soluble protein levels (pFDR < 0.05) at MHT, SHT and SHT-P. Soluble proteome  
694  $\log_2$ (FC) values were scattered against  $\log_2$ (FC) values of the corresponding genes in each sample. d.  
695 Proportions of proteins with negative correlations of abundance vs. transcript levels. The percentage of soluble  
696 proteins with increased abundance but reduced transcript levels among the entire set of all shared  
697 genes/proteins. e-f. Correlations between changes in the levels of the 355 soluble candidate priming proteins  
698 and the expression levels of the corresponding genes at MHT (e) and SHT-P (f). Soluble proteome  $\log_2$ (FC)  
699 values were scattered against  $\log_2$ (FC) of the corresponding genes in each sample. Only genes with pFDR < 0.05  
700 were included.

701  
702  
703  
704  
705  
706  
707  
708  
709

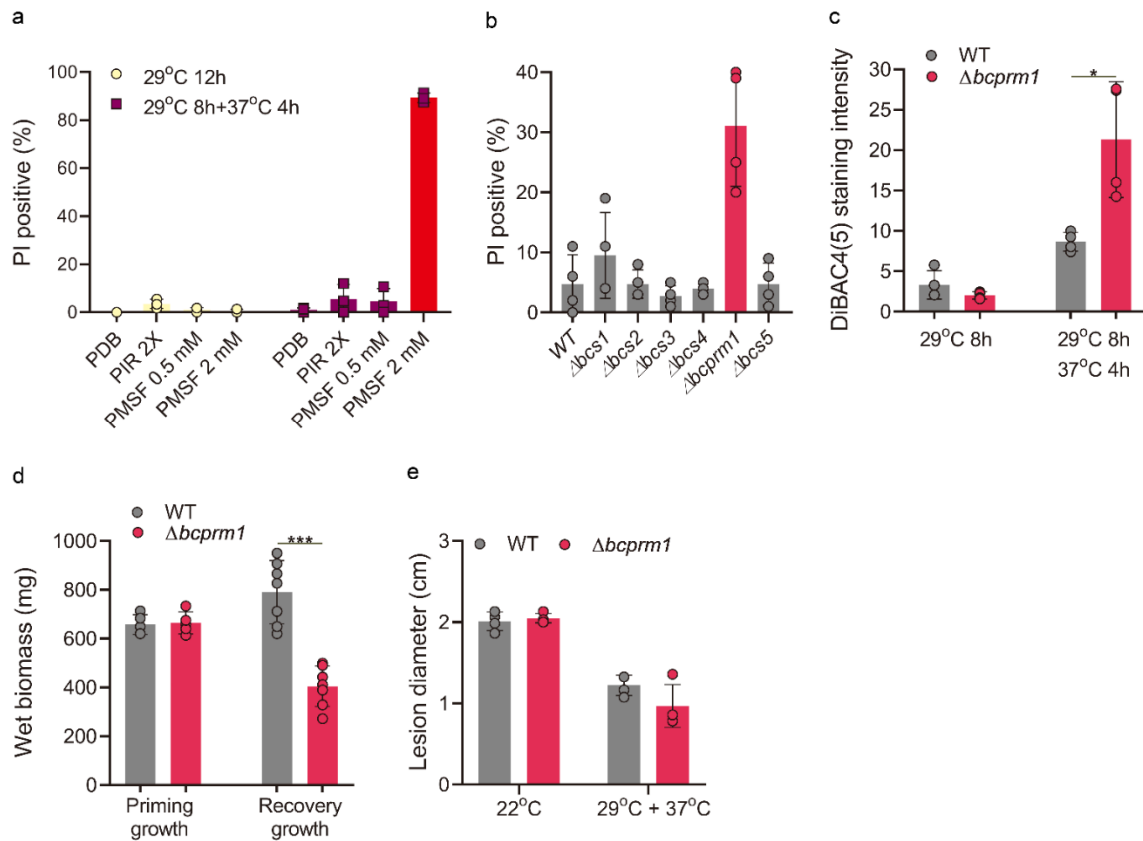

710

711

712

713

714

715

716

717

718

719

720

721

722

723

724

725

726

727

728

**Fig 5. The roles of serine-type peptidases (STPs) in priming.** **a.** Effects of protease inhibitors on priming. Spores were incubated in PDB at 29°C for 8 h, transferred to fresh medium with the indicated concentrations of protease inhibitors, incubated at 37°C for 4 h and stained with PI. **b-e.** Analysis of *STP* deletion mutants. **b.** Effects on priming of single deletion mutants in each of six *STPs* identified by RNA-seq and proteomics analyses. GTs were produced at 29°C, transferred to 37°C for 6 h and stained with PI, and the percentage of PI-positive (dead) GTs was determined. **c-e.** Analysis of the *bcpr1* (*bcin\_08g02390*) deletion strain. **c.** Measurement of cell membrane potential. GTs were produced at 29°C, transferred to 37°C for 4 h and stained with DiBAC4(5). **d.** Measurement of biomass. Initial fungal biomass was produced in malt medium at 22°C and transferred to 29°C for 12 h, the wet biomass was determined (priming growth), and the biomass was incubated at 37°C for 12 h. The cultures were then transferred to 22°C for 24 h, the mycelia were collected and biomass weight was determined (recovery growth). **e.** Infection assay. Inoculated plants were incubated for 8 h at 29°C, transferred to 37°C and incubated for 4 h, and finally incubated at 22°C for 3 d and the lesion diameter measured. Graphs represent four (**a-c,e**) or at least five (**d**) biological replications with overlaid individual data points. Values are presented as the mean of replicates  $\pm$  s.d. Statistical differences were determined according to unpaired two-tailed Student' t-test (\* $P < 0.05$ ; \*\*\* $P < 0.001$ ).

729  
730  
731  
732  
733  
734  
735  
736  
737  
738  
739  
740  
741  
742  
743  
744  
745  
746  
747  
748  
749  
750  
751  
752  
753  
754  
755  
756  
757  
758  
759  
760  
761  
762  
763  
764  
765  
766  
767  
768

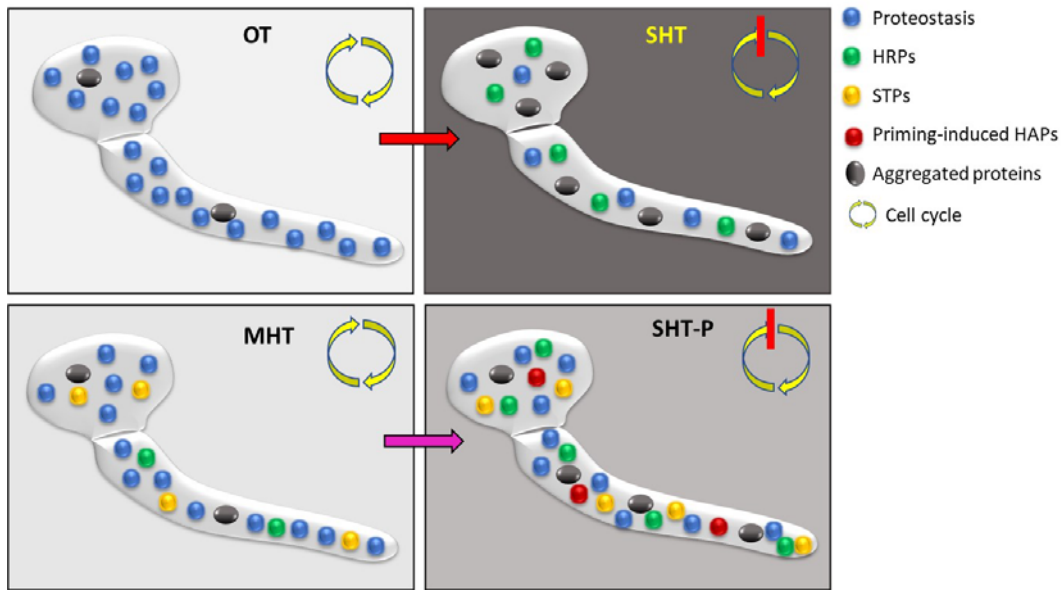

**Fig 6. Proposed model of heat priming.** Under optimal temperature (OT), the processes of protein production, aggregation and recycling are balanced and proteostasis is maintained. Moderately high temperatures (MHTs; priming temperature) induce the accumulation of priming-activating proteins, such as certain serine-type peptidases (STPs) and heat shock proteins (HSPs), protein aggregation remains low, and proteostasis and growth are maintained. A shift from OT to severely high temperature (SHT) causes an immediate arrest of the cell cycle and growth coupled with inhibited transcription and translation, accumulation of heat response proteins (HRPs), massive protein aggregation with reduced amounts of soluble proteins, loss of proteostasis and homeostasis, and rapid cell death. A shift from MHT to SHT (SHT-P) also causes cell cycle arrest, reduced protein synthesis and the accumulation of protein aggregates. However, this is accompanied by the rapid accumulation of heat adaptation proteins (HAPs) such as STPs, HSPs and trehalose biosynthesis enzymes. Therefore, a relatively high level of soluble proteins is maintained, proteotoxicity is reduced and the accumulation of cellular damage is slowed, thereby extending the survival time of the fungus under SHT.



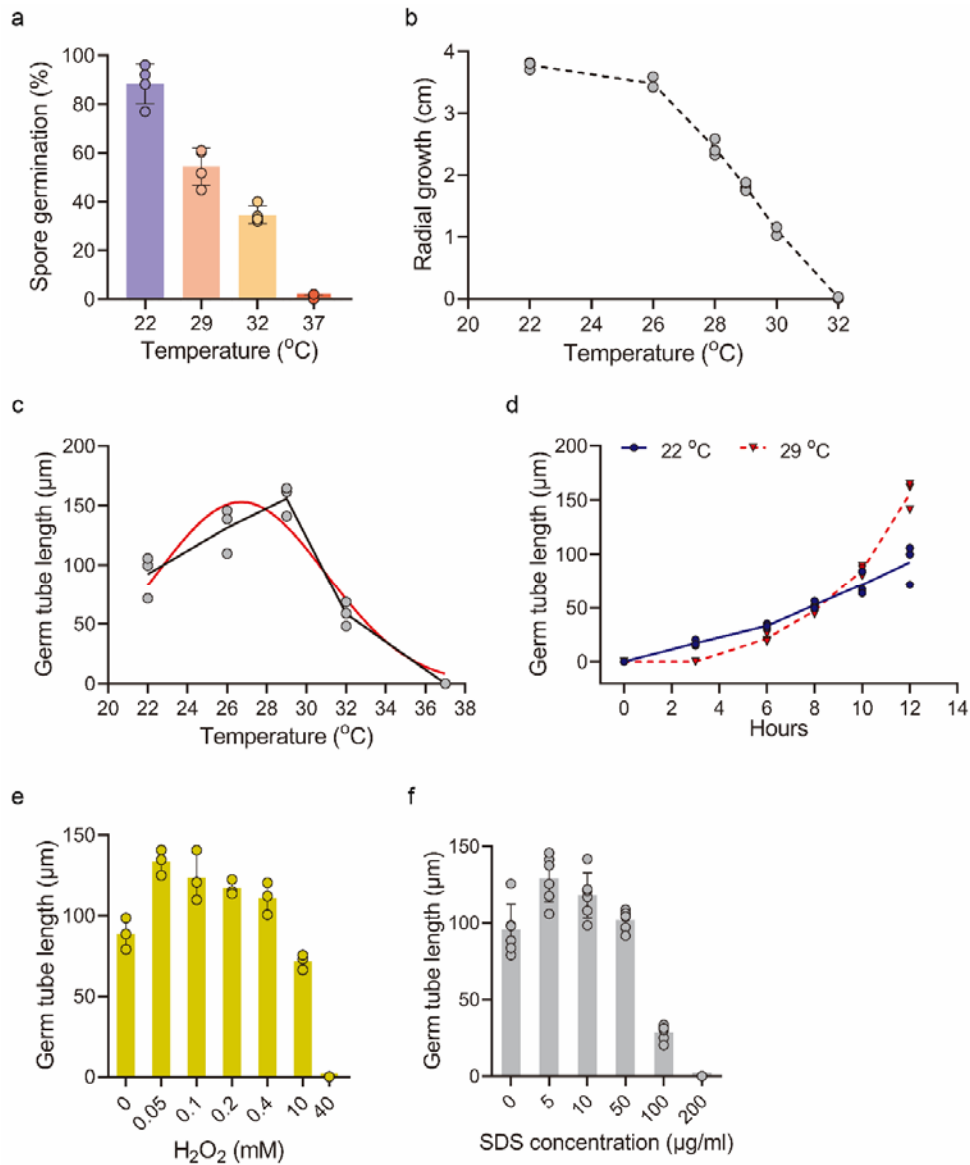

769  
770

771 **Fig S1. Growth responses of *B. cinerea* to different temperatures.** **a.** Spore germination. Spores were  
772 incubated at the indicated temperature, and germination rates were determined after 3 h of incubation at 22°C,  
773 4 h at 29°C, 8 h at 32°C or 12 h at 37°C. **b.** Colony growth. Colonies were initiated from mycelial plugs, and  
774 radial growth was measured after 3 d of incubation at the indicated temperatures. **c.** Germ tube growth.  
775 Spores were incubated at the indicated temperatures, and GT length was measured after 12 hours of  
776 incubation. Red line shows a Gaussian regression curve ( $R^2 = 0.9186$ ). **d.** Germ tube length over time. Spores  
777 were incubated at 22°C or 29°C, and GT length was recorded at different time intervals. **e,f.** Effects of oxidative  
778 ( $H_2O_2$ ) and cell wall (SDS) stress on GT growth. Spores were incubated in medium with the indicated  
779 concentrations of  $H_2O_2$  or SDS, and GT length was recorded after 12 h. Graphs represent four (**a**), three (**b–e**)  
780 and six (**f**) biological replications with overlaid individual data points. For **a**, **e** and **f**, values are presented as the  
781 mean of replicates  $\pm$  s.d.

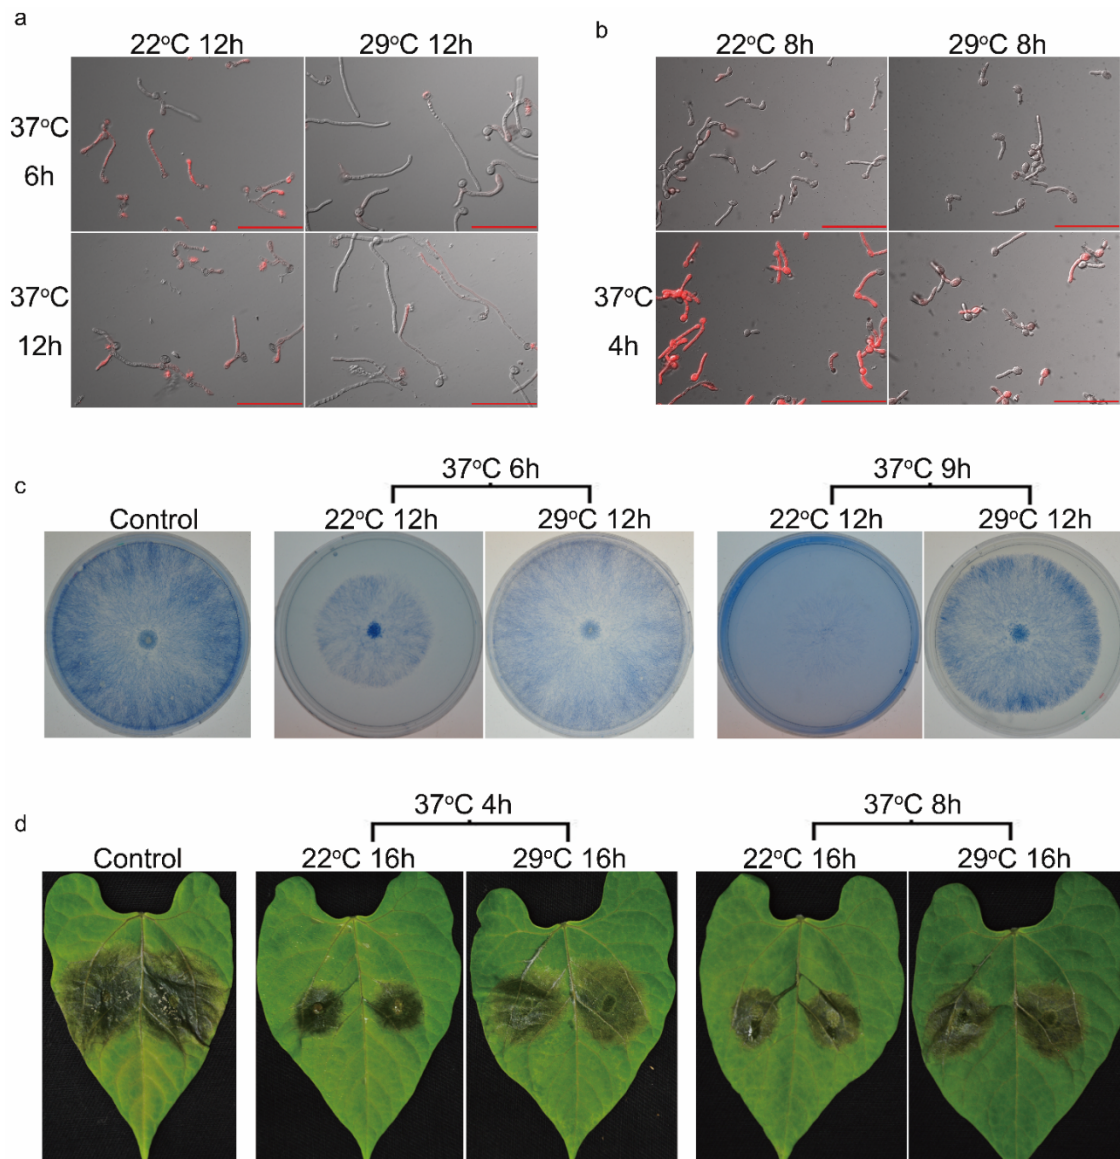

782

783

784

785

786

787

788

789

790

791

792

793

794

795

796

797

798

799

800

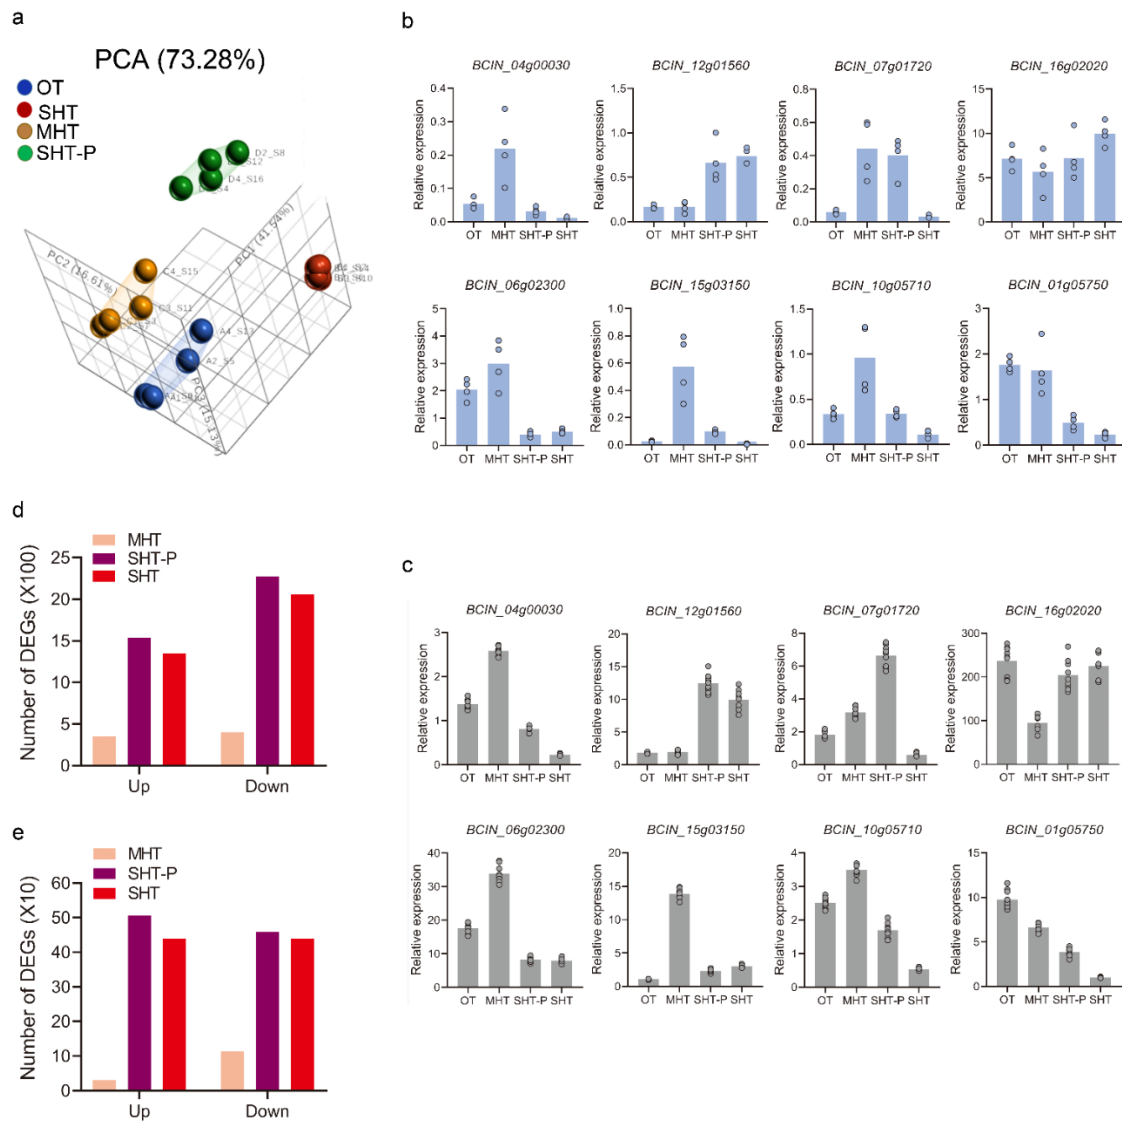

794

795

796

797

798

799

800

801

802

803

804

805

806

**Fig S3. RNA-seq data.** **a.** Principal component analysis (PCA) of all genes that were identified by RNA-seq. Fungi were grown under optimal temperature (OT, 22°C), moderately high temperature (MHT, 29°C), severely high temperature (SHT, 22°C + 37°C) or severely high temperature conditions with priming (SHT-P, 29°C + 37°C). Mycelia were harvested, and RNA was extracted and sequenced in one lane of the Illumina NextSeq 500 flow cell using the 75-bp single-end RNA-seq protocol. **b.** Relative expression levels of eight genes in the RNA-seq data. Relative expression was calculated using the RPKM value under each treatment (four biological replications) and normalized to the expression of the ribosomal protein gene *bcrsm18*. Graphs represent four biological replications with overlaid individual data points. **c.** Validation of the RNA-seq results by RT-PCR analysis. Relative expression was normalized to the ribosomal protein gene *bcrsm18*. Graphs represent nine overlaid individual data points from three independent biological replicates and three technical replicates. **d.** Number of DEGs (pFDR < 0.05, IFCI ≥ 2) at MHT, SHT-P and SHT compared to OT. **e.** Number of DEGs (pFDR < 0.05, IFCI ≥ 5) at MHT, SHT-P and SHT compared to OT.

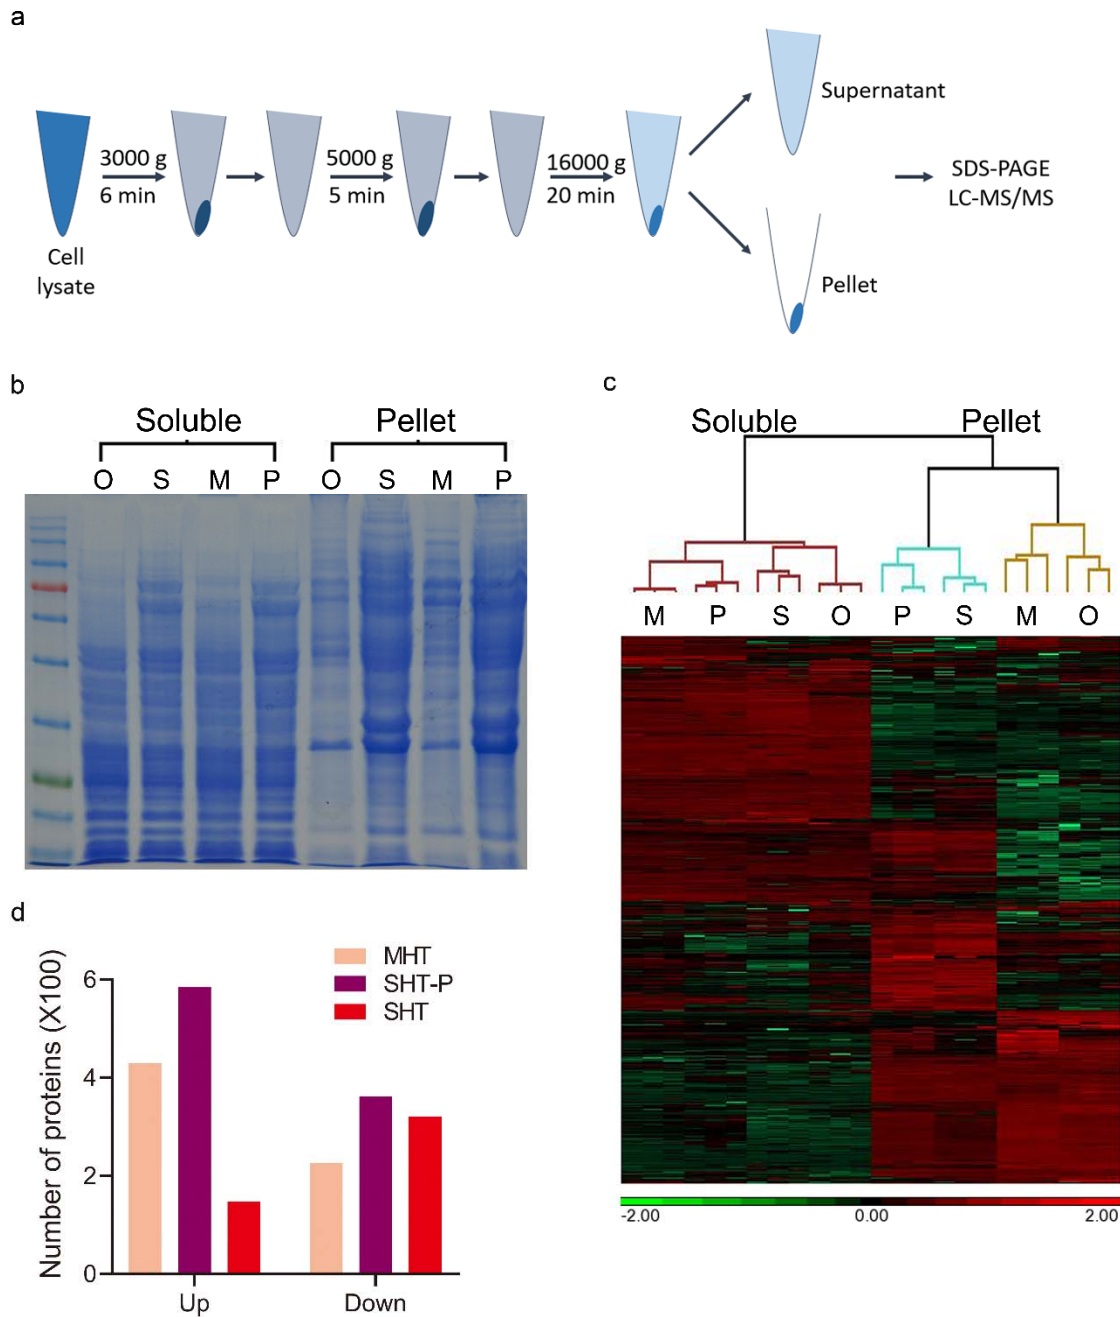

807

808

809 **Fig S4. Proteomic data.** **a.** Workflow for the separation of soluble and pellet proteins. **b.** SDS-PAGE analysis of

810 Coomassie brilliant blue stained soluble (left four lanes) and pellet (right four lanes) proteins. O: OT; M: MHT; P:

811 SHT-P; S: SHT. **c.** Expression heatmap of all the proteins identified by proteomics analysis. Soluble and pellet

812 proteins were analyzed by liquid chromatography with tandem mass spectrometry (LC-MS/MS). A total of

813 4,492 proteins were detected. O: OT; M: MHT; P: SHT-P; S: SHT. **d.** Number of soluble proteins that were up- or

814 downregulated ( $q$ -value < 0.05 and IFCI  $\geq$  2) at MHT, SHT-P and SHT compared to OT.

815

815

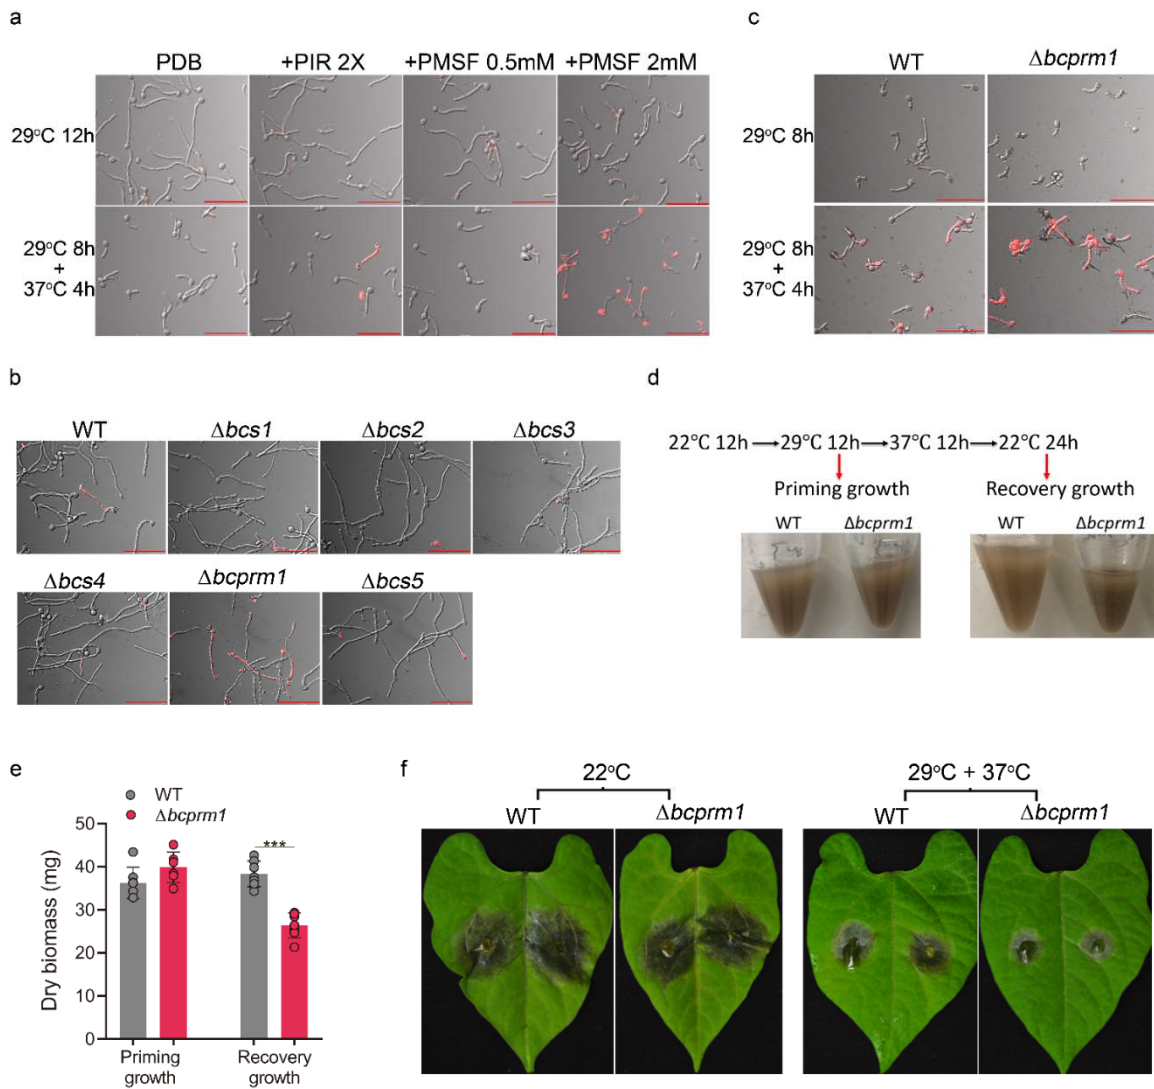

816

817

818

819

820

821

822

823

824

825

826

**Fig S5. Images showing the effects of STPs on priming.** **a–c.** Combined DIC and fluorescence (rhodamine filter) microscopic images of GTs after staining with PI (**a,c**) or DiBAC4(5) (**b**). Scale bars, 100  $\mu$ m. **d.** Workflow of biomass measurement. **e.** Measurement of dry biomass. Graph represents at least six biological replications with overlaid individual data points. Values are presented as the mean of replicates  $\pm$  s.d. Statistical differences were determined according to unpaired two-tailed Student' t-test ( $***P < 0.001$ ). **f.** Representative photographs of *P. vulgaris* leaves showing the effects of *bcpr1* deletion on priming pathogenicity under priming conditions.
